1

2

3 Evolved *Bmp6* enhancer alleles drive spatial shifts in gene  
4 expression during tooth development in sticklebacks

5

6 Mark D. Stepaniak, Tyler A. Square, and Craig T. Miller\*

7

8

9 Department of Molecular and Cell Biology, University of California-Berkeley, Berkeley CA,

10 94720, USA

11

12

13

14

15

16 Short running title: Enhancer evolution in sticklebacks

17

18 Key words: enhancer, *cis*-regulation, evolution, transgene, transgenesis, insulator, fish,  
19 stickleback, development, tooth

20

21

22 \* Corresponding author:

23 Craig T. Miller

24 Department of Molecular and Cell Biology

25 142 Weill Hall #3200

26 University of California, Berkeley

27 Berkeley, CA, 94720

28 510-642-7840

29 [ctmiller@berkeley.edu](mailto:ctmiller@berkeley.edu)

30

| 31

32  
33  
34  
35  
36  
37  
38  
39  
40  
41  
42  
43  
44  
45  
46  
47  
48  
49  
50  
51

## ABSTRACT

Mutations in enhancers have been shown to often underlie natural variation but the evolved differences between enhancer activity can be difficult to identify *in vivo*. Threespine sticklebacks (*Gasterosteus aculeatus*) are a robust system for studying enhancer evolution due to abundant natural genetic variation, a diversity of evolved phenotypes between ancestral marine and derived freshwater forms, and the tractability of transgenic techniques. Previous work identified a series of polymorphisms within an intronic enhancer of the *Bone morphogenetic protein 6* (*Bmp6*) gene that are associated with evolved tooth gain, a derived increase in freshwater tooth number that arises late in development. Here we use a bicistronic reporter construct containing a genetic insulator and a pair of reciprocal two-color transgenic reporter lines to compare enhancer activity of marine and freshwater alleles of this enhancer. In older fish the two alleles drive partially overlapping expression in both mesenchyme and epithelium of developing teeth, but the freshwater enhancer drives a reduced mesenchymal domain and a larger epithelial domain relative to the marine enhancer. In younger fish these spatial shifts in enhancer activity are less pronounced. Comparing *Bmp6* expression by *in situ* hybridization in developing teeth of marine and freshwater fish reveals similar evolved spatial shifts in gene expression. Together, these data support a model in which the polymorphisms within this enhancer underlie evolved tooth gain by shifting the spatial expression of *Bmp6* during tooth development, and provide a general strategy to identify spatial differences in enhancer activity *in vivo*.

52 INTRODUCTION

53 The process of development is largely orchestrated by developmental regulatory genes whose  
54 spatial and temporal patterns of transcription are controlled by enhancers, *cis*-regulatory  
55 elements that bind transcription factors and promote transcription of target genes (Furlong &  
56 Levine, 2018; Gasperini et al., 2020). Most developmental regulatory genes are pleiotropic, and  
57 function repeatedly at different times and in different tissues during development (Sabari s et al.,  
58 2019). Thus, mutations in enhancers of developmental regulatory genes are often more tolerated  
59 than coding sequence mutations due to having fewer pleiotropic effects, as the impacts of  
60 enhancer mutations are more likely to be restricted in time and/or space, compared to the  
61 anatomically more widespread impacts of coding mutations (Carroll, 2008). The importance of  
62 enhancers in regulating morphological evolution, natural variation, and disease phenotypes in  
63 humans is well established (Rebeiz & Tsiantis, 2017; Rickels & Shilatifard, 2018). However, a  
64 growing need has emerged for methods and approaches to compare the activity of molecularly  
65 divergent enhancer alleles.

66 *Cis*-regulatory changes have been shown to underlie the evolution of multiple  
67 morphological traits in threespine stickleback fish (*Gasterosteus aculeatus*). Threespine  
68 sticklebacks live in both marine and freshwater environments in the Northern Hemisphere,  
69 repeatedly forming populations in rivers, streams, ponds, and lakes from ancestral marine  
70 populations (Bell & Foster, 1994; McKinnon & Rundle, 2002). Following a freshwater  
71 colonization event, a suite of traits has been observed to typically evolve such as reduction in  
72 armor (Bell & Foster, 1994; Colosimo, 2005; Cresko et al., 2004) and changes in body shape  
73 (Albert et al., 2008; Reid & Peichel, 2010; Walker, 1997; Walker & Bell, 2000). Other traits that  
74 typically evolve major differences are those associated with feeding morphology, likely an

75 adaptation to different diets of larger prey in freshwater environments relative to marine  
76 ancestral environments (Bell & Foster, 1994; Gross & Anderson, 1984; Hagen, 1967; Lavin &  
77 McPhail, 1986; Schluter & McPhail, 1992). High resolution genetic mapping studies have  
78 implicated *cis*-regulatory changes as underlying several phenotypes that have evolved in  
79 freshwater, including the reduction of armor plates (Archambeault et al., 2020; Colosimo, 2005;  
80 Indjeian et al., 2016; O’Brown et al., 2015), pelvic spines (Chan et al., 2010), and pigmentation  
81 (Miller et al., 2007), and increases in branchial bone length (Erickson, et al., 2016), and  
82 pharyngeal tooth number (Cleves et al., 2014; Cleves et al., 2018).

83         Increases in pharyngeal tooth number have evolved independently in multiple freshwater  
84 stickleback populations (Ellis et al., 2015). Comparing lab-reared marine fish and freshwater fish  
85 from the benthic (bottom-dwelling) population of Paxton Lake, revealed that a divergence in  
86 tooth number occurs late in development (around ~20 mm standard length, when fish are  
87 juveniles and about half of their adult size). This difference in tooth number continues to increase  
88 and becomes more significantly different at adult stages (Cleves et al., 2014). Quantitative trait  
89 loci (QTL) mapping identified a large effect QTL that underlies this evolved tooth gain. An F2  
90 cross between a low-toothed Japanese marine fish and a high-toothed benthic Paxton Lake  
91 freshwater fish identified a QTL peak on chromosome 21 that explained approximately 30% of  
92 the variance in tooth number within the cross. The peak contained the candidate gene *Bone*  
93 *morphogenetic protein 6 (Bmp6)* which is dynamically expressed in developing teeth. *In situ*  
94 hybridization revealed *Bmp6* expression early in the overlying inner, but not outer, dental  
95 epithelium (IDE and ODE respectively), as well as in underlying dental mesenchyme, followed  
96 by a decrease in expression in the epithelium before the tooth finally erupts into a functional  
97 tooth (Cleves et al., 2014; Ellis et al., 2016). Allele specific expression experiments identified

98 *cis*-regulatory changes in *Bmp6*. In tooth tissue from F<sub>1</sub> hybrids of high-toothed Paxton benthic  
99 fish and low-toothed marine fish, a 1.4 fold decrease in *Bmp6* expression from the high-tooth  
100 freshwater Paxton benthic allele compared to the marine allele was reported (Cleves et al., 2014).  
101 Work in mice and fish has demonstrated an essential role for BMPs in developing teeth (Bei et  
102 al., 2000; Cleves et al., 2018; Jia et al., 2013; Vainio et al., 1993; Wang et al., 2012), suggesting  
103 a possible causative role of *Bmp6* in evolved tooth gain.

104 Further refinement of the QTL interval identified a haplotype containing 10 single  
105 nucleotide polymorphisms (SNPs) within intron 4 of *Bmp6* that vary concordantly with the  
106 presence or absence of the tooth QTL (Cleves et al., 2018). These variable positions define a  
107 high-tooth associated haplotype and low-tooth associated haplotype from the Paxton benthic  
108 freshwater and marine alleles, respectively. Six core SNPs lie within 468 bases upstream of the  
109 previously described minimally sufficient *Bmp6* intron 4 tooth enhancer (Fig. S1) (Cleves et al.,  
110 2018). We hypothesized that these core QTL-associated SNPs are modifying the spatial and/or  
111 temporal activity of the adjacent tooth enhancer.

112 Comparing expression patterns of two different alleles of an enhancer through reporter  
113 constructs in an organismal context presents two major problems: (1) comparisons of enhancer  
114 variants integrated in two different organisms are difficult to fully control for developmental  
115 time and genetic background differences and (2) aspects of reporter expression may in part  
116 reflect genomic integration site rather than actual enhancer activity. A single bicistronic  
117 transgenic construct that contains both enhancer/reporter pairings could address the first problem  
118 by providing a comparison within the same animal (and thus both enhancers being compared are  
119 at the same stage and in the same genotype). Furthermore, a single bicistronic construct  
120 simultaneously reduces the number of genomic integration sites to one and thus reduces position

121 effects, partially addressing the second problem. The placement of a genetic insulator between  
122 the enhancer-reporter pairings can reduce cross talk of an enhancer with the opposite paired  
123 reporter, creating a more accurate expression profile. Genetic insulators have been shown to be  
124 effective in zebrafish (Bessa et al., 2009; Shimizu & Shimizu, 2013). A second alternative  
125 approach to a single bicistronic transgene is the use of doubly transgenic two-color lines that  
126 include both marine and freshwater enhancers paired with different reporters as parts of separate  
127 transgenes. This approach addresses the first problem by having both enhancers in the same  
128 animal. With this doubly transgenic two-color line approach, enhancers can be tested with  
129 reciprocal pairings (i.e. multiple transgenic reporter lines with different enhancers driving  
130 different fluorophores), to control for possible position effects. Here we use transgenic reporter  
131 assay experiments to test the hypothesis that the marine and freshwater *Bmp6* intron 4 enhancers  
132 have different spatial and/or temporal activity in developing fish embryos, larvae, and adults. We  
133 tested this hypothesis in two ways: first, by using a bicistronic enhancer transgene to compare  
134 activities of two enhancers in the same fish, and second, by comparing doubly transgenic two-  
135 color fish in which the marine and freshwater enhancers drive different fluorophores from  
136 different genomic integrations. Lastly, we tested whether the spatial shifts in enhancer activity  
137 between marine and freshwater enhancers are also observed for endogenous patterns of *Bmp6*  
138 expression during tooth development in marine and freshwater fish.

139

140

## MATERIALS AND METHODS

### 141 **Animal statement**

142

All animal work was approved by UCB animal protocol #AUP-2015-01-7117-2. Fish were

143

reared as previously described (Erickson et al., 2014).

144

145 **Insulator containing bicistronic construct**

146 Gibson assembly was used to create bicistronic constructs to determine insulator efficiency in  
147 sticklebacks. Two enhancers with distinct expression domains were used: a 1.3kb fragment from  
148 intron 4 of *Bmp6* (Cleves et al., 2018) and the stickleback ortholog of the R2 enhancer for  
149 *Col2a1a*, first identified in zebrafish and previously shown to drive similar embryonic  
150 expression in sticklebacks (Dale & Topczewski, 2011; Erickson et al., 2016). These two  
151 enhancers were placed on opposite sides of a genetic insulator, each with a different reporter  
152 gene, either mCherry (mCh) or enhanced GFP (eGFP). The mouse tyrosinase GAB insulator was  
153 amplified off the 2pC\_GS plasmid (Bessa et al., 2009), while the R2 *Col2a1a* enhancer was PCR  
154 amplified from a previously used reporter plasmid (Erickson et al., 2016). The intron 4 enhancer  
155 of *Bmp6* was PCR amplified from a reporter plasmid containing either the freshwater allele from  
156 the benthic Paxton Lake population or the allele from the Little Campbell marine population  
157 (Cleves et al., 2018). All enhancers were PCR amplified simultaneously with the *Hsp70l*  
158 promoter as a single amplicon. eGFP and mCh were amplified from previously used reporter  
159 plasmids (O’Brown et al., 2015). Primers used and assembly steps are listed in the Supplemental  
160 Methods. All components were combined using a Gibson assembly reaction (New England  
161 Biolabs ref # E2611L) following the manufacturer’s protocol and transformed into XL1 blue  
162 competent cells. Transformed cells were grown on ampicillin containing LB plates and colony  
163 inserts were sequence verified by colony PCR. Positive colonies were used to start 50 ml  
164 cultures, which were grown overnight. Plasmids were then isolated by Qiagen midi-prep (ref  
165 #12145), and Sanger sequence verified.



166 Tol2 transposase mRNA was transcribed using the plasmid pCS2-TP (Kawakami, 2004)  
167 that had been linearized with *NotI*. The linear plasmid was used as template for in vitro  
168 transcription using the mMessage SP6 kit (#AM1340). The resulting mRNA was purified using  
169 Qiagen RNeasy columns (#74104). Transgene plasmids were co-injected with Tol2 mRNA into  
170 newly in vitro fertilized one-cell embryos as described (Erickson et al., 2016). Approximately  
171 200ng of plasmid in 1µl was combined with 1µl of 2M KCl, 0.5µl of 0.5% phenol red, and  
172 approximately 1µl of 350 ng/µl of Tol2 transposase mRNA, with water added to a final volume  
173 of 5µl, yielding a total concentration of ~40ng/µl of plasmid and 70ng/µl of mRNA. Embryos  
174 were generated from Rabbit Slough (Alaska) marine fish, and lines established and maintained  
175 by crossing to lab-reared fish from this same population.

176

### 177 **Generation of single color and doubly transgenic two-color reporter lines**

178 The previously described ~1.3kb *Bmp6* intron 4 tooth enhancer (Cleves et al. 2018) was  
179 amplified from a Paxton Lake benthic fish and Little Campbell marine fish (Figure S1) using the  
180 primer pairs MDS35/36  
181 (GCCGGCTAGCGAGAGCATCCGTCTTGTGGG/GCCGGGATCCAGAGTCCTGATGGCCT  
182 CTCC) to create reporter plasmids containing the positive orientation (i.e. same 5' to 3'  
183 orientation as in endogenous locus) of the enhancer relative to the reporter gene or MDS27/28  
184 (GCCGGCTAGCAGAGTCCTGATGGCCTCTCC/GCCGGGATCCGAGAGCATCCGTCTTG  
185 TGGG) to create reporter plasmids containing the negative orientation [i.e. the opposite 5' to 3'  
186 orientation as in the endogenous locus, and possibly more similar to the orientation that an  
187 enhancer 3' to the promoter (e.g. an enhancer in intron 4) would be after looping to contact the  
188 promoter] of the enhancer. The fragments were then cloned in both possible 5' to 3' orientations

189 into a Tol2 reporter construct upstream of the zebrafish *Hsp70l* promoter and either eGFP or  
190 mCherry using *BamHI* and *NheI* in the previously generated reporter constructs. Fish that were  
191 transgenic for both the marine and the freshwater reporter alleles were generated in one of two  
192 ways: (1) crossing of stable lines each containing a single transgene (2) injection of one reporter  
193 construct into a stable transgenic line of the opposite (i.e. different population and fluorophore)  
194 allele.

195

### 196 **Detecting enhancer activity by fluorescent microscopy**

197 Enhancer activity of the transgenic constructs was imaged by fluorescent microscopy. Previous  
198 work demonstrated a *cis*-regulatory difference in *Bmp6* expression between marine and  
199 freshwater alleles, with the difference arising late in development (Cleves et al., 2014). As both a  
200 divergence in tooth number attributed to the QTL and allele specific expression (ASE)  
201 differences arise late in development, post-20 mm total length (Cleves et al., 2014; Cleves et al.,  
202 2018), reporter positive fish were dissected at standard lengths pre- and post-tooth number  
203 divergence (20 mm total length) as previously described (Ellis & Miller, 2016). Tooth plates  
204 were then fixed in 4% PFA in 1x PBS for 60 minutes, washed through a graded series of 3:1, 1:1,  
205 1:3 water and glycerol solutions into 100% glycerol, flat-mounted, and imaged. Comparisons  
206 were made across the different alleles and orientations on a Leica M165FC fluorescent dissecting  
207 microscope with filters GFP1 (#10447447) and RhodB (#10447360), and a Leica DM2500  
208 compound microscope with filters GFP (#11532366) and TX2 (#11513885). To compare  
209 enhancer activity in fish before and after tooth divergence (20 mm standard length), ventral tooth  
210 plates and dorsal tooth plates were imaged and enhancer activity was assessed in the dental  
211 epithelium and mesenchyme of each tooth, in each of three pre-divergence sized fish (between

212 16 - 18.5 mm total length) and three post-divergence sized fish (between 30 – 48 mm total  
213 length) in two different sets of integrations and enhancer/reporter pairings. If the QTL-associated  
214 SNPs are responsible for the QTL peak and therefore tooth number differences observed late in  
215 development, as well as the ASE differences, we would expect the enhancers to have different  
216 activity in > 20 mm fish compared to < 20 mm fish. We would also expect the enhancers to have  
217 similar activity earlier in development, when allele specific expression was not significantly  
218 different between the freshwater and marine alleles (Cleves et al., 2014).

219

### 220 **Quantification of enhancer activity differences across tooth development**

221 As we hypothesized that the QTL associated intronic polymorphisms result in differential  
222 enhancer activity in the dental mesenchyme and/or epithelium, we characterized enhancer  
223 activity in both tissues across multiple tooth plates. The stage of each tooth was scored as either  
224 early (late cap to early bell stages in which mesenchyme has condensed under the epithelium but  
225 no mineralization has occurred), middle (mineralization of the forming tooth has started to occur,  
226 also called late bell stage) or late (a fully formed tooth has erupted, also called functional stage  
227 (Ellis et al., 2015)). The activity for each enhancer allele was recorded as either present or absent  
228 in the epithelium (early and middle stages) and mesenchyme. Additionally, we also recorded if  
229 either allele (marine or freshwater) drove more robust or extensive expression in each domain,  
230 indicating an allelic bias.

231

### 232 ***In situ* hybridization on sections**

233 Stickleback adult (~40 cm standard length) pharyngeal tissues were prepared, sectioned, and  
234 assayed by ISH in parallel to compare the spatial distribution of *Bmp6* mRNA. Adults derived

235 from marine (Rabbit Slough [RABS]) and freshwater (Paxton Benthic [PAXB]) populations  
236 were euthanized, and their pharyngeal tissues were fixed overnight in 4% formaldehyde (Sigma  
237 P6148) in 1x phosphate-buffered saline (PBS) at 4° C with heavy agitation, washed 3x 20 min  
238 with PBST on a nutator, then decalcified for 5 days in 20% ethylenediaminetetraacetic acid  
239 (EDTA, pH 8.0) at room temperature on a nutator. Marine and freshwater fish were always  
240 collected and prepared in parallel such that all storage and preparation intervals were equivalent.  
241 The *in situ* hybridization (ISH) for *Bmp6* was carried out as described previously (Square et al.,  
242 2021), with some modifications to ensure maximally comparable assays were carried out on  
243 marine and freshwater samples in parallel. A previously published *Bmp6* riboprobe was used in  
244 this study (Cleves et al., 2014; Square et al., 2021). The *Bmp6* riboprobe was synthesized with  
245 digoxigenin-labeled UTP and added at a concentration of ~300 ng/mL in 20 mL of hybridization  
246 buffer, split between 2 different LockMailer slide containers (Sigma-Aldrich), and agitated  
247 overnight in a rotating hybridization oven at 67° C. Slides from marine and freshwater fish were  
248 cohoused in the hybridization buffers to ensure equal exposure to the riboprobe between marine  
249 and freshwater samples. Hybridization buffer washes, blocking, and antibody incubation steps  
250 were as previously described (Square et al., 2021). Signal development was carried out for 2, 3,  
251 or 7 days to visualize mRNA localization. Marine and freshwater slides were developed in  
252 parallel (in the same solutions, in the same LockMailer containers), and only those sections that  
253 experienced the same coloration reaction were compared (i.e. we only directly compared sections  
254 that were prepared in parallel). To prepare slides for imaging, they were counterstained with  
255 DAPI, rinsed then washed 3x 5+ min with deionized H<sub>2</sub>O, coverslipped with deionized H<sub>2</sub>O, and  
256 imaged on a Leica DM2500 microscope. The procedure outlined in this section was replicated

257 three times, each replication used two marine and two freshwater adults, for a total of n=6 fish  
258 from each background.

259

## 260 RESULTS

### 261 **Two ways to compare enhancers in transgenic fish**

262 We used two strategies to compare enhancer alleles in the same transgenic fish. First, we used a  
263 single bicistronic construct with a genetic insulator separating two enhancer/reporter pairs.

264 Second, we used two separate transgenic constructs, independently integrated in the same fish  
265 line and each containing a single enhancer allele (marine or freshwater, Figure S1) with a distinct  
266 fluorescent reporter (eGFP or mCherry), to generate doubly transgenic two-color fish.

267

### 268 **Insulator efficiency in F<sub>0</sub> fish**

269 To test the first strategy of a bicistronic construct separated by an insulator, a bicistronic  
270 construct was generated using two enhancers that drive expression in non-overlapping domains.

271 In sticklebacks, the *Col2a1a R2* enhancer drives expression in the developing notochord with  
272 expression seen by the third day post fertilization (dpf) (Erickson, Ellis, et al., 2016). By 8 dpf  
273 we observed *R2* reporter expression in the developing craniofacial skeleton, including Meckel's  
274 cartilage, the hyosymplectic, and the ceratohyal (Figure S2), similar to the reported enhancer  
275 activity in zebrafish (Dale & Topczewski, 2011). The *Bmp6* intron 4 tooth enhancer has not been  
276 reported to drive expression in the domains seen in the *R2 Col2a1a* enhancer. In addition, the  
277 previously described tooth and early fin domains (Cleves et al., 2018), as well as the presently  
278 described late fin domains, are not domains in which the *Col2a1a* enhancer has been observed to  
279 drive expression. Thus, to our knowledge these two enhancers drive distinct and non-overlapping

280 expression domains within these embryonic and larval tissues, providing multiple locations that  
281 can test for insulation within the construct.

282 Three clutches were injected with a *Col2a1a* enhancer/*Bmp6* tooth enhancer bicistronic  
283 construct (Figure 1A) for a total of 228 injected embryos, of which 92 were scoreable at 7 dpf.  
284 Four domains (left and right pectoral fins, median fin fold, and notochord) were scored for  
285 insulation efficiency (0-2 for no to complete insulation, see Supplemental Methods). Across all  
286 domains the average insulator score was 0.94 (Table S1). Overall, the bicistronic construct using  
287 the mouse tyrosinase insulator element (GAB) moderately prevented reporter genes from being  
288 activated by nearby enhancers when placed between the elements. Within the same F<sub>0</sub> fish we  
289 observed both insulated and uninsulated domains, with insulation even varying within a domain  
290 (Figure 1B). For example, insulation was observed in the median fin and left pectoral fin, but not  
291 within some regions of the right pectoral fin of a 7 dpf embryo in which both mCherry and eGFP  
292 were observed. To control for enhancer/reporter pairing, the inverse construct was created, with  
293 the *Col2a1a* enhancer driving eGFP and the *Bmp6* tooth enhancer driving mCherry. A total of  
294 154 fish were injected across two clutches, with 30 surviving to 7 dpf that were scoreable, with  
295 an average score of 0.64 (Table S2). Overall, both insulator constructs demonstrate the ability to  
296 drive some degree of separate expression domains of two enhancers concurrently, consistent  
297 with results reported in zebrafish that showed insulators can block enhancer-promoter crosstalk  
298 (Bessa et al., 2009).

299

### 300 **Insulator effectiveness in stable fish**

301 Variation in insulator effectiveness across an individual F<sub>0</sub> fish may be due to different genomic  
302 integrations of the bicistronic constructs. To determine the effectiveness of a single bicistronic

303 transgene, F<sub>0</sub> fish were outcrossed to create stable F<sub>1</sub> individuals for the *Col2a1a* R2:mCherry;  
304 *Bmp6* tooth enhancer:eGFP bicistronic construct. In 7 dpf F<sub>1</sub> embryos, complete fin domains of  
305 the *Bmp6* enhancer were observed, with insulation apparent in some but not all domains (Figure  
306 1B). In adults, *Bmp6* enhancer activity was observed in the intersegmental joints of fins  
307 (described below), however no mCherry was observed, suggesting effective insulation in that  
308 domain (Figure 1B). Insulator activity was also observed in pharyngeal teeth (Figure 1C). The  
309 *Bmp6* enhancer was observed to drive expression in the mesenchyme and inner dental epithelium  
310 (IDE) of pharyngeal teeth (Figure 1D), consistent with previous reports. mCherry was not  
311 observed in the tooth domains, suggesting effective insulation in adult teeth. Thus, in stable  
312 transgenic adults the insulator can separate the activity of the two enhancers, including within the  
313 dental epithelium and mesenchyme domains of the *Bmp6* enhancer.

314

### 315 **Bicistronic construct reveals spatial shifts in mesenchymal and epithelial activity of *Bmp6*** 316 **enhancer alleles**

317 Since the GAB genetic insulator can block enhancer-promoter crosstalk in bicistronic constructs,  
318 a bicistronic construct with both the marine and freshwater alleles (Figure 2A) was used to create  
319 a stable line as a first test for enhancer activity differences. The marine allele, paired with  
320 mCherry, appeared to drive a more robust mesenchymal domain compared to the freshwater  
321 allele (Figure 2B-C). In contrast, within the inner dental epithelium more GFP than mCherry  
322 signal was detected, suggesting an expanded epithelial domain driven by the freshwater enhancer  
323 compared to the marine allele. Thus, in developing teeth from fish with this bicistronic  
324 transgene, the marine allele drove more robust expression in the mesenchyme while the  
325 freshwater allele drove more robust expression in the epithelium.

326

327 **Doubly transgenic fish confirm expanded freshwater epithelial *Bmp6* enhancer activity in**  
328 **post-divergence fish**

329 As a second method to compare the spatial and temporal activity of marine and freshwater  
330 enhancer alleles, we generated stable bi-color transgenic lines with the two different alleles of  
331 the *Bmp6* intron 4 tooth enhancer on separate constructs: freshwater:eGFP;marine:mCherry, in  
332 the opposite 5' to 3' direction as the endogenous locus, and freshwater:mCherry;marine:eGFP, in  
333 the same 5' to 3' direction as the endogenous locus. In adult fish, both marine and freshwater  
334 enhancers were observed to drive dynamic expression in the IDE, more intensely at earlier  
335 stages, and diminishing as development of the tooth approaches eruption (Figure 3A-C, and  
336 Figure S3A-C), consistent with *Bmp6* expression detected by whole-mount in situ hybridization  
337 (Cleves et al., 2014; Ellis et al., 2016). In multiple tooth germs, a brighter focus was observed at  
338 the distal tip of the epithelium with both enhancers (Figure 3A-C & Figure S3A-C), a domain  
339 resembling the localized distal epithelial expression of *Fgf10* and putative enamel knot in shark  
340 embryos (Rasch et al., 2016). This distal epithelial domain was the last epithelial region to drive  
341 reporter expression prior to cessation in the epithelium. While both enhancers were observed to  
342 drive expression in the epithelium, the freshwater allele drove seemingly more robust expression  
343 of the reporter, both in terms of intensity as well as spatial extent of the domain (Figure 3B-C,  
344 Figure S3B-C).

345

346 **Doubly transgenic fish confirm reduced freshwater mesenchymal *Bmp6* enhancer activity**  
347 **in post-divergence fish**



348 Reporter expression from the two alleles appeared in the mesenchyme of teeth across all stages.  
349 In pre-eruption (early and middle stage) tooth germs, condensed mesenchyme was observed to  
350 show activity of both enhancers (Figure 3B-C and Figure S3B-C). In fully formed, erupted, late-  
351 stage teeth, reporter expression was observed in the mesenchymal core, extending from the tip of  
352 the core down to the base of the tooth where expression widened. Deeper mesenchyme was  
353 observed to consistently display marine but not freshwater enhancer activity. The deeper,  
354 broader, and more robust mesenchymal expression domain driven by the marine allele compared  
355 to the freshwater allele was also observed in stages of tooth development prior to eruption  
356 (Figure 3B-C and Figure S3B-C).

357

358 **Reciprocal reporter/enhancer pairing in second doubly transgenic two-color line support**  
359 **epithelial and mesenchymal shifts in enhancer activity**

360 To determine if the previous observations were artifacts due to factors such as transgene position  
361 effects, fluorophore used, or enhancer orientation, next we made constructs where each enhancer  
362 had an opposite enhancer orientation and drove the other fluorophore (Fig. 3D). These constructs  
363 were then randomly integrated by Tol2-mediated transgenesis, representing independent  
364 genomic integrations of oppositely oriented enhancers with alternate fluorophores,  
365 simultaneously controlling for genomic position effect, enhancer orientation, and fluorophore  
366 strength. Using these reciprocal constructs, we again observed the epithelial and mesenchymal  
367 differences seen in the bicistronic construct and the first double transgenic line, suggesting the  
368 QTL-associated freshwater SNPs reduce mesenchymal and expand epithelial enhancer activity  
369 (Figure 3E-F and Figure S3E-F).

370

371 **Less pronounced enhancer activity differences in early fish**

372 Allele specific differences in the expression levels of the freshwater and marine alleles of *Bmp6*,  
373 as well as tooth number, have been shown to arise later in development (> 20 mm fish length).  
374 We hypothesized that if the SNPs found within the freshwater and marine haplotypes contribute  
375 to the allele specific expression differences, and subsequently tooth number differences, the  
376 differences in enhancer expression should be more pronounced in larger fish compared to  
377 smaller fish. Fish smaller than the tooth divergence point (~16-18.5 mm juveniles, see Methods)  
378 were dissected from each genotype and tooth plates were fixed and imaged (Figure 4). While the  
379 epithelial and mesenchymal expression differences observed in the older post-divergence stages  
380 were still present in both the dental epithelium and mesenchyme (Figure 4C,F), the enhancer  
381 differences were less pronounced. In multiple early and middle stage teeth the epithelium  
382 showed similar activity from both alleles (Figure 4C,F), unlike the expanded freshwater  
383 epithelial domain that was observed in larger fish. Overall, the expression patterns of the two  
384 enhancers appeared more similar in pre-divergence fish, consistent with previous allele specific  
385 expression and tooth number results (Cleves et al., 2014).

386

387 **Quantification of epithelial and mesenchymal expression patterns**

388 Quantification of epithelial and mesenchymal expression, and bias towards enhancer activity was  
389 scored for three tooth plates of each type (ventral and dorsal) at pre and post tooth number  
390 divergence (Supplemental Material). In post divergence fish, activity of the freshwater enhancer  
391 was observed in the epithelium in both ventral and dorsal tooth plates in nearly all pre-eruption  
392 teeth (Figure 5A & Table S3). The marine allele was detected in the epithelium of only a subset  
393 of pre-eruption teeth, from approximately 70-90% of pre-eruption teeth in pooled tooth plate data

394 (Figure 5A). When combining tooth plate data for each genotype the marine enhancer was active  
395 in the epithelium in a higher percentage of early stage germs compared to middle stage  
396 (marine:mCherry;freshwater:eGFP early: 44/52 [84.6%], middle 39/51 [76.5%] and  
397 marine:eGFP;freshwater:mCherry early: 39/47 [83.0%], middle 30/40 [75%]). The pattern is still  
398 present when data is sorted by tooth plate and genotype (Supplemental Material). Therefore,  
399 while there does appear to be a stage effect, variation also exists within stages. Overall, the  
400 freshwater enhancer drove expression more frequently and more robustly in the epithelium of  
401 early and middle stage teeth compared to the marine allele in post divergence fish. However, in  
402 pre-divergence fish, the epithelium of all pre-eruption teeth exhibited robust expression of both  
403 enhancers, across both genotypes and tooth plates (Figure 5A).

404 A bias towards the marine allele in the mesenchyme was observed in nearly every early  
405 or middle stage tooth germ, while the lack of bias, or entirely overlapping mesenchymal  
406 expression, was almost exclusively observed in late stage (erupted) tooth germs (Table S4). The  
407 ventral tooth plates had an increased prevalence of marine enhancer bias in the mesenchyme of  
408 individual teeth compared to the dorsal tooth plates (marine:mCherry;freshwater:eGFP ventral:  
409 146/167 [87.4%], dorsal: 102/149, [68.5%] and marine:eGFP;freshwater:mCherry ventral:  
410 123/136 [90.4%], dorsal: 122/149 [81.9%]). In early and middle stage teeth, we observed a  
411 consistent marine bias in the mesenchyme of both the ventral and dorsal tooth plates. In fully  
412 formed erupted teeth, a difference between the tooth plates became apparent. A larger proportion  
413 of erupted teeth were observed to have a marine bias in the mesenchyme in the ventral tooth  
414 plate compared to the dorsal tooth plate (Figure 5B-C).

415 There was a reduction in the proportion of erupted teeth with a marine bias when  
416 comparing post to pre divergence fish for all integrations and tooth plates (pre-divergence

417 marine:mCherry;freshwater:eGFP ventral 54/80 [67.5%], dorsal 55/91 [60.4%] and  
418 marine:eGFP;freshwater:mCherry ventral 63/98 [64.3%], dorsal 51/103 [49.5%]) (Figure 5B)  
419 except for the dorsal tooth plates in the freshwater:eGFP;marine:mCherry genotype. Overall a  
420 bias towards marine expression in the mesenchyme was observed, with a consistently larger  
421 proportion of late stage teeth demonstrating a bias in the ventral teeth compared to the dorsal  
422 teeth, with the difference between tooth plates becoming more drastic in larger fish. Thus, the  
423 trend in marine mesenchymal bias across dorsal versus ventral tooth plates mirrors the  
424 chromosome 21 tooth number QTL, which had a 28 LOD greater effect on ventral pharyngeal  
425 tooth number than dorsal pharyngeal tooth number (Miller et al., 2014). In addition, the  
426 difference in bias between pre-divergence and post-divergence fish is consistent with allele  
427 specific expression data in which early in development the marine and freshwater alleles of  
428 *Bmp6* are expressed at more similar levels, while in older fish there is a *cis*-regulatory reduction  
429 in expression of the freshwater allele (Cleves et al., 2014).

430

### 431 **Pectoral and caudal fin expression differences**

432 The *Bmp6* intron 4 enhancer was previously known to drive expression in the developing fin  
433 margins of the pectoral and caudal fins early in development, starting approximately 4 dpf  
434 (Cleves et al., 2018). In pre-hatching fish, 6 dpf, the domains of the two enhancers appear to be  
435 identical (Figure S4A). We found that enhancer activity persists at later stages in both the  
436 pectoral and caudal fins, specifically in the intersegmental joints. The fin rays of all fins in  
437 sticklebacks consist of a series of repeated segments, made up of hemi-segments encasing a  
438 mesenchymal core like other teleosts (Haas, 1962; Santamaría et al., 1992). In the caudal fin of  
439 both genotypes (freshwater:eGFP;marine:mCherry and freshwater:mCherry;marine:eGFP), the

440 freshwater enhancer was observed to have activity in multiple intersegmental joints, while the  
441 activity of the marine enhancer was detected in none or few joints (Figure S4B). A similar  
442 pattern is observed in the pectoral fins (Figure S4C). With both enhancers, more basal joints  
443 were observed to have expression, while fluorophore intensity diminished as the joints became  
444 more distal. Overall, across both fin types, the freshwater allele appeared to be active in a larger  
445 number of intersegmental joints. While more proximal intersegmental joints were more likely to  
446 have activity from both enhancers, the most proximal joint was observed to be lacking detectable  
447 reporter expression in some fin rays (Figure S5A&B), suggesting a dynamic cycle of initial  
448 inactivity in newly formed, distal, intersegmental joints, followed by a period of activity in most  
449 joints as they adopt a more proximal identity, and a final transition to inactivity in the proximal  
450 most joints just prior to the ultimate fusion of basal most segment to the next segment.

451

#### 452 ***Bmp6* expression differences between marine and freshwater fish**

453 Given the consistent differences in reporter gene activity observed for the marine and freshwater  
454 enhancers, we next asked if endogenous *Bmp6* expression differed in tooth germs between  
455 marine and freshwater animals in a similar fashion. To answer this, we performed *in situ*  
456 hybridization (ISH) on thin sections of pharyngeal tissues from marine (Rabbit Slough) and  
457 freshwater (Paxton Benthic) adults (~40 mm standard length). Marine and freshwater samples  
458 were collected, prepared, and assayed in parallel to ensure maximal comparability of the  
459 resulting data (see Methods). While early bud and cap stage tooth germs did not show any  
460 consistent differences in gene expression, we did observe more widespread mesenchymal  
461 expression in marine tooth germs at early and late bell stages, and consistently widespread IDE  
462 expression in freshwater epithelium relative at late bell stages (Figure 8). These ISH results

463 corroborate the reporter construct activity, suggesting that the regulation of *Bmp6* mRNA in  
464 tooth germs varies in the same direction as the variation in activity seen between the marine and  
465 freshwater *Bmp6* intron 4 enhancers.

466

## 467 DISCUSSION

### 468 **Freshwater and marine alleles of *Bmp6* tooth enhancer drive expression differences in** 469 **developing teeth**

470 Throughout the development of a tooth, multiple pathways and signals, including BMPs, are  
471 involved in organ initiation and growth. Knocking out the receptor *Bmpr1a* in the dental  
472 epithelium of mice leads to arrested development of the tooth at the bud stage, demonstrating a  
473 key activating role for BMP signaling during tooth development (Andl, 2004). Overexpressing  
474 *Noggin*, a BMP antagonist, in the epithelium also results in arrest at the placode stage (Wang et  
475 al., 2012). In addition, in *Msx1* mutant mice, exogenous *Bmp4* can rescue tooth development  
476 (Bei et al., 2000). Together, these results suggest a dynamic role of *Bmp* signaling in tooth  
477 development, both promoting and inhibiting tooth development at different stages. *Bmp6* is  
478 dynamically expressed during stickleback tooth development. Expression is detected early in the  
479 overlying inner dental epithelium (IDE) as well as in the condensing underlying odontogenic  
480 mesenchyme, with a subsequent cessation of expression in the epithelium, and continuous  
481 expression in the mesenchyme of the ossifying tooth (Cleves et al., 2014; Ellis et al., 2016).  
482 Freshwater sticklebacks homozygous for mutations in *Bmp6* have reductions in tooth number,  
483 showing *Bmp6* is required for aspects of tooth development in fish (Cleves et al., 2018).

484 A previously identified freshwater high-toothed associated haplotype within intron 4 of  
485 *Bmp6* underlies an evolved increase in tooth number. The core haplotype is defined by six

486 polymorphic sites in the 468 bp region upstream of a minimally sufficient *Bmp6* tooth enhancer,  
487 potentially modifying enhancer activity. Three lines of evidence (the bicistronic line, and two  
488 line of reciprocal two-color lines) support the hypothesis that the associated polymorphisms  
489 upstream of the *Bmp6* tooth enhancer result in evolved spatial shifts in enhancer activity between  
490 the marine and freshwater alleles (Figures 1-4). Both alleles drove expression in the epithelium  
491 of early developing teeth, and in dental mesenchyme throughout development, similar to the  
492 expression pattern of the adjacent minimally sufficient 511 bp tooth enhancer previously  
493 reported (Cleves et al., 2018) as well as the reported expression of the endogenous *Bmp6* gene  
494 during tooth development (Cleves et al., 2014). In all three different transgenic comparisons, we  
495 observed the freshwater, high-toothed associated enhancer allele maintained a more robust  
496 expression domain in the overlying epithelium for a longer portion of a tooth's development  
497 compared to the marine, low-toothed associated allele in multiple independent lines. Conversely,  
498 the marine allele appeared to drive reporter expression in a larger domain in the underlying  
499 mesenchyme in a large proportion of teeth. We additionally found that marine and freshwater  
500 endogenous *Bmp6* gene expression domains differed in a manner that was consistent with the  
501 reporter gene results. Specifically, we observed larger mesenchymal domains in marine relative  
502 to freshwater fish, and expanded IDE domains in freshwater relative to marine fish, especially in  
503 late bell stage tooth germs. Together these data support the hypothesis that the intron 4 enhancer  
504 variants associated with tooth number differences drive *Bmp6* expression differences in tooth  
505 germs of >20 mm fish, which in turn leads to evolved tooth gain in freshwater fish (Figure 7).  
506 Outstanding questions include what these deep mesenchymal cells are and whether the expanded  
507 marine mesenchymal domain might include quiescent mesenchymal cells involved in tooth  
508 replacement. Other important questions include whether the differential expression of the

509 endogenous *Bmp6* gene that occurs between marine and freshwater fish is at least partially driven  
510 by the two enhancer alleles, and if so, what the allelic effects are on tooth development and  
511 replacement, and which mutations are responsible for the expression differences.

512 Previous allele specific expression (ASE) experiments demonstrated a 1.4 fold reduction  
513 in the freshwater *Bmp6* allele compared to the marine in F<sub>1</sub> hybrid adult tooth tissue that included  
514 the entire ventral pharyngeal jaw, and thus both tooth epithelial and mesenchymal cells (Cleves  
515 et al., 2014). The mesenchymal biases in reporter expression are consistent with the ASE result,  
516 with more robust mesenchymal expression driven by the marine allele compared to the  
517 freshwater allele potentially responsible for the higher expression of the marine allele in the ASE  
518 experiments. In contrast, the expanded freshwater epithelial enhancer domain is not consistent  
519 with the overall ASE result in which freshwater alleles had *cis*-regulatory downregulation  
520 relative to marine alleles. Since the reduced mesenchymal domain in the freshwater enhancer  
521 relative to the marine enhancer was the most striking qualitative difference, it is possible that the  
522 epithelial bias, with a stronger signal driven by the freshwater enhancer, is quantitatively  
523 canceled out by the bias in the mesenchyme, explaining the overall reduction of freshwater *Bmp6*  
524 expression compared to marine *Bmp6* expression in F<sub>1</sub> hybrids.

525 The enhancer expression differences appeared more pronounced in larger, post tooth  
526 number divergence fish compared to smaller, pre tooth number divergence fish. While the  
527 mesenchyme appeared to have a somewhat reduced difference of expression between the two  
528 alleles, the epithelium demonstrated less pronounced differences in activity between the alleles  
529 in pre-divergence fish. The observation is consistent with ASE results and the divergence in  
530 tooth number in marine and freshwater fish. While the mesenchymal difference was still  
531 observable early, it is possible there are other regulatory regions which act as repressors for the



532 marine *Bmp6* allele or enhancers for the freshwater *Bmp6* allele early in development and so  
533 mask the mesenchymal bias of the marine intron 4 enhancer. For example, we previously  
534 reported a 5' *Bmp6* tooth enhancer that likely also contributes to the overall pattern of *Bmp6* in  
535 developing teeth (Erickson et al., 2015).

536 Future experiments to measure ASE in isolated tissues, with epithelium and mesenchyme  
537 separated could test whether opposing quantitative differences are present in dental epithelium  
538 vs. mesenchyme, as the new data presented here suggest. A quantitative method could be used to  
539 further test a hypothesis in which the two enhancers drive differing levels of expression, such as  
540 pyrosequencing (Wittkopp, 2012) with the two enhancers both driving identical fluorophores,  
541 with a single synonymous mutation distinguishing the two. Alternatively, single-cell RNA-seq  
542 (scRNA-seq) in the dental epithelium and mesenchyme, targeting the respective reporters of each  
543 enhancer, could determine if there are quantifiable expression differences between the two  
544 enhancers.

545

#### 546 **QTL-associated sequence difference in alleles may underlie expression domain differences**

547 There are 14 point mutations and three indels distinguishing a low-toothed marine (Little  
548 Campbell) allele from the high-toothed Paxton Lake allele of the intron 4 enhancer in our  
549 reporter constructs. Previous experiments identified ten of these SNPs that co-occur consistently  
550 with the presence or absence of a tooth number QTL and of these ten, the core six are present in  
551 the enhancer reporter constructs tested here (Cleves et al., 2018). From our results we are unable  
552 to distinguish whether these six polymorphisms contribute to the expression differences we  
553 observed. While it is possible that the three indels or the eight non-QTL-associated SNPs may  
554 contribute, it is an attractive and parsimonious hypothesis that the same SNPs that co-occur with

555 the tooth QTL are also responsible for the reporter expression differences, and the previously  
556 described allele specific expression results. Of the six QTL-associated SNPs tested here, of  
557 special interest is the second QTL-associated SNP (C $\leftarrow$ →T), which in the freshwater allele,  
558 creates a predicted NFATc1 binding site (Cleves et al., 2018). NFATc1 was shown to have  
559 importance in the balancing of quiescent and actively dividing stem cells in hair follicles  
560 (Horsley et al., 2008) which share homology with teeth (Ahn, 2015; Biggs & Mikkola, 2014;  
561 Pispá & Thesleff, 2003), and so a difference in NFATc1 binding may potentially play a role in  
562 the *Bmp6* allele specific expression and enhancer activity differences observed previously and  
563 here. Supporting this hypothesis, *Nfatc1b* expression was recently shown to be present in  
564 stickleback tooth germs and functional tooth mesenchyme (Square et al., 2021).

565 To better determine which polymorphisms may underlie the expression differences we  
566 observed, hybrid enhancers can be made. For example, if the creation of an NFATc1 binding site  
567 is at least partially responsible for the observed differences, a marine allele with the SNP  
568 converted to the freshwater identity, from a ‘C’ to a ‘T’, may recapitulate the freshwater  
569 enhancer expression patterns. By creating and testing hybrid enhancers, future experiments could  
570 test which enhancer polymorphisms alone and in combination, contribute to the expression  
571 differences reported here.

572

### 573 **Fin expression differences**

574 In addition to the reporter expression differences driven by the two enhancers during tooth  
575 development, we observed distinct expression patterns in the pectoral and caudal fins. It was  
576 previously known that the minimal 511 base pair enhancer drove expression in the margins of  
577 early pectoral and median fins, but expression in adult fins had not been described. BMP

578 signaling plays a role in fin regeneration, with BMP inhibition reducing osteoblast differentiation  
579 in new cells arising at the leading edge of the regenerating fin (Stewart et al., 2014). During  
580 zebrafish fin regeneration *bmp2b*, *bmp4*, and *bmp6* are expressed, and are thought to be  
581 important (Laforest et al., 1998; Murciano et al., 2002; Quint et al., 2002; Smith et al., 2006).  
582 While both alleles of the *Bmp6* enhancer drive expression in the pectoral and caudal fins of  
583 sticklebacks, the differing enhancer activities may result in developmental differences, through  
584 osteoblast function in the developing lepidotrichia and intersegmental joints, possibly leading to  
585 different fin morphologies and/or regenerative abilities. Differences in expression of *bmp2* have  
586 been observed in the regeneration of different rays of the caudal fin in cichlids (Ahi et al., 2017),  
587 as well as the expression of the gene *msxb*, which is downstream of *bmp* signaling in the  
588 regenerating zebrafish fin (Smith et al., 2006).

589 Multiple studies have identified habitat specific differences in fin morphology (Hendry et  
590 al., 2011; Kristjánsson et al., 2005; Taylor & McPhail, 1986). As the two enhancers are derived  
591 from populations with two distinct ecotypes, a benthic freshwater population, and a highly  
592 mobile anadromous population, it is possible this enhancer may influence pectoral and caudal fin  
593 size and shape in an adaptive manner. Characterization of fin morphology using fish from either  
594 a population in which the high-toothed and low-toothed associated haplotypes are segregating, or  
595 those from a control cross in which both alleles were present in the founding, could test whether  
596 there is a fin morphology difference associated with the different alleles.

597

### 598 **Bicistronic constructs and the use of genetic insulators**

599 Simultaneous comparison of two enhancer alleles in a single organism via a bicistronic construct  
600 is an attractive means to compare molecularly divergent enhancers (e.g. pairs of enhancers that

601 contain sequence variation across populations to determine if there are population specific  
602 differences of enhancer activity). Previous work in zebrafish utilized genetic insulators as part of  
603 an enhancer trap as well as with two different tissue specific promoters and demonstrated the  
604 effectiveness of the technique (Bessa et al., 2009; Shimizu & Shimizu, 2013).

605 Here we used a bicistronic construct with a *Bmp6* enhancer and *Col2a1a* enhancer  
606 driving different fluorophores in mosaically transgenic F<sub>0</sub> fish to test whether the activities of  
607 two enhancers could be insulated from each other. Within the same F<sub>0</sub> individual, some domains  
608 demonstrated a high degree of insulator effectiveness while others did not. There are at least two  
609 possible explanations: 1) the insulated vs. non-insulated regions represent distinct and mosaic  
610 integration events, with the insulator effectiveness determined by the integration site in a  
611 particular subpopulation of cells, or 2) the same integration event can differ in insulator behavior  
612 stochastically or based on some context that differs from an insulated expression domain to an  
613 un-insulated domain. Regardless, examining enhancer activity in stable lines will still provide a  
614 more complete picture of the role of the regulatory element and has advantages over mosaic F<sub>0</sub>  
615 analyses.

616 Genetic insulators have been reported to limit enhancer activity across the insulator  
617 boundary (Bessa et al., 2009; Shimizu & Shimizu, 2013) as well as protect against position  
618 effects (Chung et al., 1993), while other experiments show a lack of protection (Grajevskaja et  
619 al., 2013). The insulator used here, from the 5' end of the mouse tyrosinase locus, was reported to  
620 bind CTCF, like the  $\beta$ -globin 5'HS4 insulator from chicken, and is reported to prevent influences  
621 from nearby chromatin state and gene activity, the hallmarks of genetic insulators (Giraldo,  
622 2003; Molto et al., 2009; Montoliu et al., 1996). As there are conflicting reports of the use of  
623 insulators to fully shield from nearby chromatin states and position effects, the combined use of a

624 landing pad locus could help to further reduce these effects (Roberts et al., 2014). We  
625 recommend a multiple pronged approach utilizing multiple transgenic lines (e.g. either  
626 bicistronic constructs or multiple independent reciprocal two-color lines where each enhancer  
627 drives a different fluorophore in the same animal). Similar methods in doubly transgenic animals  
628 should allow future dissection of spatial differences in enhancer alleles, with the two methods  
629 acting as means of independent verification.

630 Changes in *cis*-regulation of developmental genes can be an important driver of  
631 morphological evolution, as well as human disease. The impact of mutations in *cis*-regulatory  
632 regions can be difficult to predict, and if the effect is subtle or slight, also to detect. The use of  
633 two enhancers in the same individual, either as parts of two independent transgenes or within a  
634 single bicistronic construct, can both control for the trans-environment and make even slight  
635 differences in expression activity apparent due to simultaneous imaging of reporter genes driven  
636 by both enhancers. Such an approach allows for directly comparing molecularly divergent  
637 regulatory elements, potentially identifying causal polymorphisms with important developmental  
638 and evolutionary implications.

639

#### 640 DATA AVAILABILITY STATEMENT

641 Strains and plasmids are available upon request. The authors affirm that all data necessary for  
642 confirming the conclusions of the article are present within the article, figures, and tables.

643

#### 644 ACKNOWLEDGEMENTS

645 We thank Phillip Cleves, James Hart, Priscilla Erickson, Ana Shaughnessy for helpful  
646 discussions, and Sophie Archambeault and Alyssa Borman for comments on the manuscript.

647

648

#### FUNDING

649 MDS was supported by an NSF-GRF; TAS was supported by NIH Fellowship F32-DE027871 to

650 TAS and CTM; MDS, TAS, and CTM were supported by NIH Grant R01-DE021475 to CTM.

651

652

#### CONFLICTS OF INTEREST

653 None to report.

654

655

#### REFERENCES

656 Ahi, E. P., Richter, F., & Sefc, K. M. (2017). A gene expression study of ornamental fin shape in

657 *Neolamprologus brichardi*, an African cichlid species. *Scientific Reports*, 7(1), 17398.

658 <https://doi.org/10.1038/s41598-017-17778-0>

659 Ahn, Y. (2015). Signaling in Tooth, Hair, and Mammary Placodes. In *Current Topics in*

660 *Developmental Biology* (Vol. 111, pp. 421–459). Elsevier.

661 <https://doi.org/10.1016/bs.ctdb.2014.11.013>

662 Albert, A. Y. K., Sawaya, S., Vines, T. H., Knecht, A. K., Miller, C. T., Summers, B. R.,

663 Balabhadra, S., Kingsley, D. M., & Schluter, D. (2008). The genetics of adaptive shape

664 shift in stickleback: Pleiotropy and effect size. *Evolution; International Journal of*

665 *Organic Evolution*, 62(1), 76–85. <https://doi.org/10.1111/j.1558-5646.2007.00259.x>

666 Andl, T. (2004). Epithelial *Bmpr1a* regulates differentiation and proliferation in postnatal hair

667 follicles and is essential for tooth development. *Development*, 131(10), 2257–2268.

668 <https://doi.org/10.1242/dev.01125>

- 669 Archambeault, S. L., Bärtschi, L. R., Merminod, A. D., & Peichel, C. L. (2020). Adaptation via  
670 pleiotropy and linkage: Association mapping reveals a complex genetic architecture  
671 within the stickleback *Eda* locus. *Evolution Letters*, 4(4), 282–301.  
672 <https://doi.org/10.1002/evl3.175>
- 673 Bei, M., Kratochwil, K., & Maas, R. L. (2000). BMP4 rescues a non-cell-autonomous function  
674 of *Msx1* in tooth development. *Development (Cambridge, England)*, 127(21), 4711–  
675 4718.
- 676 Bell, M. A., & Foster, S. A. (Eds.). (1994). *The evolutionary biology of the threespine*  
677 *stickleback*. Oxford University Press.
- 678 Bessa, J., Tena, J. J., de la Calle-Mustienes, E., Fernández-Miñán, A., Naranjo, S., Fernández,  
679 A., Montoliu, L., Akalin, A., Lenhard, B., Casares, F., & Gómez-Skarmeta, J. L. (2009).  
680 Zebrafish enhancer detection (ZED) vector: A new tool to facilitate transgenesis and the  
681 functional analysis of *cis* -regulatory regions in zebrafish. *Developmental Dynamics*,  
682 238(9), 2409–2417. <https://doi.org/10.1002/dvdy.22051>
- 683 Biggs, L. C., & Mikkola, M. L. (2014). Early inductive events in ectodermal appendage  
684 morphogenesis. *Seminars in Cell & Developmental Biology*, 25–26, 11–21.  
685 <https://doi.org/10.1016/j.semcdb.2014.01.007>
- 686 Carroll, S. B. (2008). Evo-Devo and an Expanding Evolutionary Synthesis: A Genetic Theory of  
687 Morphological Evolution. *Cell*, 134(1), 25–36. <https://doi.org/10.1016/j.cell.2008.06.030>
- 688 Chan, Y. F., Marks, M. E., Jones, F. C., Villarreal, G., Shapiro, M. D., Brady, S. D., Southwick,  
689 A. M., Absher, D. M., Grimwood, J., Schmutz, J., Myers, R. M., Petrov, D., Jonsson, B.,  
690 Schluter, D., Bell, M. A., & Kingsley, D. M. (2010). Adaptive Evolution of Pelvic

- 691 Reduction in Sticklebacks by Recurrent Deletion of a Pitx1 Enhancer. *Science*,  
692 327(5963), 302–305. <https://doi.org/10.1126/science.1182213>
- 693 Chung, J. H., Whiteley, M., & Felsenfeld, G. (1993). A 5' element of the chicken beta-globin  
694 domain serves as an insulator in human erythroid cells and protects against position effect  
695 in *Drosophila*. *Cell*, 74(3), 505–514. [https://doi.org/10.1016/0092-8674\(93\)80052-g](https://doi.org/10.1016/0092-8674(93)80052-g)
- 696 Cleves, P. A., Ellis, N. A., Jimenez, M. T., Nunez, S. M., Schluter, D., Kingsley, D. M., &  
697 Miller, C. T. (2014). Evolved tooth gain in sticklebacks is associated with a cis-  
698 regulatory allele of Bmp6. *Proceedings of the National Academy of Sciences*, 111(38),  
699 13912–13917. <https://doi.org/10.1073/pnas.1407567111>
- 700 Cleves, Phillip A., Ellis, N. A., Jimenez, M. T., Nunez, S. M., Schluter, D., Kingsley, D. M., &  
701 Miller, C. T. (2014). Evolved tooth gain in sticklebacks is associated with a cis-  
702 regulatory allele of Bmp6. *Proceedings of the National Academy of Sciences*, 111(38),  
703 13912–13917. <https://doi.org/10.1073/pnas.1407567111>
- 704 Cleves, Phillip A., Hart, J. C., Agoglia, R. M., Jimenez, M. T., Erickson, P. A., Gai, L., & Miller,  
705 C. T. (2018). An intronic enhancer of Bmp6 underlies evolved tooth gain in sticklebacks.  
706 *PLOS Genetics*, 14(6), e1007449. <https://doi.org/10.1371/journal.pgen.1007449>
- 707 Colosimo, P. F. (2005). Widespread Parallel Evolution in Sticklebacks by Repeated Fixation of  
708 Ectodysplasin Alleles. *Science*, 307(5717), 1928–1933.  
709 <https://doi.org/10.1126/science.1107239>
- 710 Cresko, W. A., Amores, A., Wilson, C., Murphy, J., Currey, M., Phillips, P., Bell, M. A.,  
711 Kimmel, C. B., & Postlethwait, J. H. (2004). Parallel genetic basis for repeated evolution  
712 of armor loss in Alaskan threespine stickleback populations. *Proceedings of the National*



- 713 *Academy of Sciences of the United States of America*, 101(16), 6050–6055.
- 714 <https://doi.org/10.1073/pnas.0308479101>
- 715 Dale, R. M., & Topczewski, J. (2011). Identification of an evolutionarily conserved regulatory  
716 element of the zebrafish col2a1a gene. *Developmental Biology*, 357(2), 518–531.  
717 <https://doi.org/10.1016/j.ydbio.2011.06.020>
- 718 Ellis, N. A., Glazer, A. M., Donde, N. N., Cleves, P. A., Agoglia, R. M., & Miller, C. T. (2015).  
719 Distinct developmental genetic mechanisms underlie convergently evolved tooth gain in  
720 sticklebacks. *Development*, 142(14), 2442–2451. <https://doi.org/10.1242/dev.124248>
- 721 Ellis, Nicholas A., Donde, N. N., & Miller, C. T. (2016). Early development and replacement of  
722 the stickleback dentition: Stickleback tooth Patterning. *Journal of Morphology*, 277(8),  
723 1072–1083. <https://doi.org/10.1002/jmor.20557>
- 724 Ellis, Nicholas A., & Miller, C. T. (2016). Dissection and Flat-mounting of the Threespine  
725 Stickleback Branchial Skeleton. *Journal of Visualized Experiments*, 111, 54056.  
726 <https://doi.org/10.3791/54056>
- 727 Erickson, P. A., Cleves, P. A., Ellis, N. A., Schwalbach, K. T., Hart, J. C., & Miller, C. T.  
728 (2015). A 190 base pair, TGF- $\beta$  responsive tooth and fin enhancer is required for  
729 stickleback Bmp6 expression. *Developmental Biology*, 401(2), 310–323.  
730 <https://doi.org/10.1016/j.ydbio.2015.02.006>
- 731 Erickson, P. A., Ellis, N. A., & Miller, C. T. (2016). Microinjection for Transgenesis and  
732 Genome Editing in Threespine Sticklebacks. *Journal of Visualized Experiments*, 111,  
733 54055. <https://doi.org/10.3791/54055>
- 734 Erickson, P. A., Glazer, A. M., Cleves, P. A., Smith, A. S., & Miller, C. T. (2014). Two  
735 developmentally temporal quantitative trait loci underlie convergent evolution of

- 736 increased branchial bone length in sticklebacks. *Proceedings of the Royal Society B:*  
737 *Biological Sciences*, 281(1788), 20140822. <https://doi.org/10.1098/rspb.2014.0822>
- 738 Erickson, P. A., Glazer, A. M., Killingbeck, E. E., Agoglia, R. M., Baek, J., Carsanaro, S. M.,  
739 Lee, A. M., Cleves, P. A., Schluter, D., & Miller, C. T. (2016). Partially repeatable  
740 genetic basis of benthic adaptation in threespine sticklebacks: REPEATABLE  
741 EVOLUTION IN BENTHIC STICKLEBACKS. *Evolution*, 70(4), 887–902.  
742 <https://doi.org/10.1111/evo.12897>
- 743 Furlong, E. E. M., & Levine, M. (2018). Developmental enhancers and chromosome topology.  
744 *Science (New York, N.Y.)*, 361(6409), 1341–1345.  
745 <https://doi.org/10.1126/science.aau0320>
- 746 Gasperini, M., Tome, J. M., & Shendure, J. (2020). Towards a comprehensive catalogue of  
747 validated and target-linked human enhancers. *Nature Reviews Genetics*, 21(5), 292–310.  
748 <https://doi.org/10.1038/s41576-019-0209-0>
- 749 Giraldo, P. (2003). Functional dissection of the mouse tyrosinase locus control region identifies a  
750 new putative boundary activity. *Nucleic Acids Research*, 31(21), 6290–6305.  
751 <https://doi.org/10.1093/nar/gkg793>
- 752 Grajevskaja, V., Balciuniene, J., & Balciunas, D. (2013). Chicken  $\beta$ -globin insulators fail to  
753 shield the nkx2.5 promoter from integration site effects in zebrafish. *Molecular Genetics*  
754 *and Genomics*, 288(12), 717–725. <https://doi.org/10.1007/s00438-013-0778-0>
- 755 Gross, H. P., & Anderson, J. M. (1984). Geographic Variation in the Gillrakers and Diet of  
756 European Threespine Sticklebacks, *Gasterosteus aculeatus*. *Copeia*, 1984(1), 87.  
757 <https://doi.org/10.2307/1445038>

- 758 Haas, H. J. (1962). Studies on mechanisms of joint and bone formation in the skeleton rays of  
759 fish fins. *Developmental Biology*, 5(1), 1–34. [https://doi.org/10.1016/0012-](https://doi.org/10.1016/0012-1606(62)90002-7)  
760 [1606\(62\)90002-7](https://doi.org/10.1016/0012-1606(62)90002-7)
- 761 Hagen, D. W. (1967). Isolating Mechanisms in Threespine Sticklebacks ( *Gasterosteus* ).  
762 *Journal of the Fisheries Research Board of Canada*, 24(8), 1637–1692.  
763 <https://doi.org/10.1139/f67-138>
- 764 Hendry, A. P., Hudson, K., Walker, J. A., Räsänen, K., & Chapman, L. J. (2011). Genetic  
765 divergence in morphology-performance mapping between Misty Lake and inlet  
766 stickleback: Genetic divergence in morphology-performance mapping. *Journal of*  
767 *Evolutionary Biology*, 24(1), 23–35. <https://doi.org/10.1111/j.1420-9101.2010.02155.x>
- 768 Horsley, V., Aliprantis, A. O., Polak, L., Glimcher, L. H., & Fuchs, E. (2008). NFATc1 Balances  
769 Quiescence and Proliferation of Skin Stem Cells. *Cell*, 132(2), 299–310.  
770 <https://doi.org/10.1016/j.cell.2007.11.047>
- 771 Indjeian, V. B., Kingman, G. A., Jones, F. C., Guenther, C. A., Grimwood, J., Schmutz, J.,  
772 Myers, R. M., & Kingsley, D. M. (2016). Evolving New Skeletal Traits by cis -  
773 Regulatory Changes in Bone Morphogenetic Proteins. *Cell*, 164(1–2), 45–56.  
774 <https://doi.org/10.1016/j.cell.2015.12.007>
- 775 Jia, S., Zhou, J., Gao, Y., Baek, J.-A., Martin, J. F., Lan, Y., & Jiang, R. (2013). Roles of Bmp4  
776 during tooth morphogenesis and sequential tooth formation. *Development*, 140(2), 423–  
777 432. <https://doi.org/10.1242/dev.081927>
- 778 Kawakami, K. (2004). Transgenesis and gene trap methods in zebrafish by using the Tol2  
779 transposable element. *Methods in Cell Biology*, 77, 201–222.  
780 [https://doi.org/10.1016/s0091-679x\(04\)77011-9](https://doi.org/10.1016/s0091-679x(04)77011-9)

- 781 Kristjánsson, B. K., Skúlason, S., & Noakes, D. L. G. (2005). Unusual number of pectoral fin  
782 rays in an Icelandic population of threespine stickleback (*Gasterosteus aculeatus*) recently  
783 isolated in freshwater. *Evolutionary Ecology*, *18*(4), 379–384.  
784 <https://doi.org/10.1007/s10682-004-2679-5>
- 785 Laforest, L., Brown, C. W., Poleo, G., Géraudie, J., Tada, M., Ekker, M., & Akimenko, M. A.  
786 (1998). Involvement of the sonic hedgehog, patched 1 and bmp2 genes in patterning of  
787 the zebrafish dermal fin rays. *Development (Cambridge, England)*, *125*(21), 4175–4184.
- 788 Lavin, P. A., & McPhail, J. D. (1986). Adaptive Divergence of Trophic Phenotype among  
789 Freshwater Populations of the Threespine Stickleback ( *Gasterosteus aculeatus* ).  
790 *Canadian Journal of Fisheries and Aquatic Sciences*, *43*(12), 2455–2463.  
791 <https://doi.org/10.1139/f86-305>
- 792 McKinnon, J. S., & Rundle, H. D. (2002). Speciation in nature: The threespine stickleback model  
793 systems. *Trends in Ecology & Evolution*, *17*(10), 480–488.  
794 [https://doi.org/10.1016/S0169-5347\(02\)02579-X](https://doi.org/10.1016/S0169-5347(02)02579-X)
- 795 Miller, C. T., Beleza, S., Pollen, A. A., Schluter, D., Kittles, R. A., Shriver, M. D., & Kingsley,  
796 D. M. (2007). Cis-Regulatory Changes in Kit Ligand Expression and Parallel Evolution  
797 of Pigmentation in Sticklebacks and Humans. *Cell*, *131*(6), 1179–1189.  
798 <https://doi.org/10.1016/j.cell.2007.10.055>
- 799 Miller, C. T., Glazer, A. M., Summers, B. R., Blackman, B. K., Norman, A. R., Shapiro, M. D.,  
800 Cole, B. L., Peichel, C. L., Schluter, D., & Kingsley, D. M. (2014). Modular Skeletal  
801 Evolution in Sticklebacks Is Controlled by Additive and Clustered Quantitative Trait  
802 Loci. *Genetics*, *197*(1), 405–420. <https://doi.org/10.1534/genetics.114.162420>

- 803 Molto, E., Fernandez, A., & Montoliu, L. (2009). Boundaries in vertebrate genomes: Different  
804 solutions to adequately insulate gene expression domains. *Briefings in Functional*  
805 *Genomics and Proteomics*, 8(4), 283–296. <https://doi.org/10.1093/bfgp/elp031>
- 806 Montoliu, L., Umland, T., & Schütz, G. (1996). A locus control region at –12 kb of the  
807 tyrosinase gene. *The EMBO Journal*, 15(22), 6026–6034. <https://doi.org/10.1002/j.1460->  
808 [2075.1996.tb00991.x](https://doi.org/10.1002/j.1460-2075.1996.tb00991.x)
- 809 Murciano, C., Fernández, T. D., Durán, I., Maseda, D., Ruiz-Sánchez, J., Becerra, J., Akimenko,  
810 M. A., & Mari-Beffa, M. (2002). Ray–Interray Interactions during Fin Regeneration of  
811 *Danio rerio*. *Developmental Biology*, 252(2), 214–224.  
812 <https://doi.org/10.1006/dbio.2002.0848>
- 813 O’Brown, N. M., Summers, B. R., Jones, F. C., Brady, S. D., & Kingsley, D. M. (2015). A  
814 recurrent regulatory change underlying altered expression and Wnt response of the  
815 stickleback armor plates gene EDA. *ELife*, 4, e05290.  
816 <https://doi.org/10.7554/eLife.05290>
- 817 Pispá, J., & Thesleff, I. (2003). Mechanisms of ectodermal organogenesis. *Developmental*  
818 *Biology*, 262(2), 195–205. [https://doi.org/10.1016/s0012-1606\(03\)00325-7](https://doi.org/10.1016/s0012-1606(03)00325-7)
- 819 Quint, E., Smith, A., Avaron, F., Laforest, L., Miles, J., Gaffield, W., & Akimenko, M.-A.  
820 (2002). Bone patterning is altered in the regenerating zebrafish caudal fin after ectopic  
821 expression of sonic hedgehog and *bmp2b* or exposure to cyclopamine. *Proceedings of the*  
822 *National Academy of Sciences*, 99(13), 8713–8718.  
823 <https://doi.org/10.1073/pnas.122571799>
- 824 Rasch, L. J., Martin, K. J., Cooper, R. L., Metscher, B. D., Underwood, C. J., & Fraser, G. J.  
825 (2016). An ancient dental gene set governs development and continuous regeneration of

- 826 teeth in sharks. *Developmental Biology*, 415(2), 347–370.
- 827 <https://doi.org/10.1016/j.ydbio.2016.01.038>
- 828 Rebeiz, M., & Tsiantis, M. (2017). Enhancer evolution and the origins of morphological novelty.
- 829 *Current Opinion in Genetics & Development*, 45, 115–123.
- 830 <https://doi.org/10.1016/j.gde.2017.04.006>
- 831 Reid, D. T., & Peichel, C. L. (2010). Perspectives on the genetic architecture of divergence in
- 832 body shape in sticklebacks. *Integrative and Comparative Biology*, 50(6), 1057–1066.
- 833 <https://doi.org/10.1093/icb/icq030>
- 834 Rickels, R., & Shilatifard, A. (2018). Enhancer Logic and Mechanics in Development and
- 835 Disease. *Trends in Cell Biology*, 28(8), 608–630.
- 836 <https://doi.org/10.1016/j.tcb.2018.04.003>
- 837 Roberts, J. A., Miguel-Escalada, I., Slovik, K. J., Walsh, K. T., Hadzhiev, Y., Sanges, R.,
- 838 Stupka, E., Marsh, E. K., Balciuniene, J., Balciunas, D., & Muller, F. (2014). Targeted
- 839 transgene integration overcomes variability of position effects in zebrafish. *Development*,
- 840 141(3), 715–724. <https://doi.org/10.1242/dev.100347>
- 841 Sabarís, G., Laiker, I., Preger-Ben Noon, E., & Frankel, N. (2019). Actors with Multiple Roles:
- 842 Pleiotropic Enhancers and the Paradigm of Enhancer Modularity. *Trends in Genetics:*
- 843 *TIG*, 35(6), 423–433. <https://doi.org/10.1016/j.tig.2019.03.006>
- 844 Santamaría, J. A., Marí-Beffa, M., & Becerra, J. (1992). Interactions of the lepidotrichial matrix
- 845 components during tail fin regeneration in teleosts. *Differentiation*, 49(3), 143–150.
- 846 <https://doi.org/10.1111/j.1432-0436.1992.tb00662.x>
- 847 Schluter, D., & McPhail, J. D. (1992). Ecological Character Displacement and Speciation in
- 848 Sticklebacks. *The American Naturalist*, 140(1), 85–108. <https://doi.org/10.1086/285404>

- 849 Shimizu, A., & Shimizu, N. (2013). Dual promoter expression system with insulator ensures a  
850 stringent tissue-specific regulation of two reporter genes in the transgenic fish.  
851 *Transgenic Research*, 22(2), 435–444. <https://doi.org/10.1007/s11248-012-9653-8>
- 852 Smith, A., Avaron, F., Guay, D., Padhi, B. K., & Akimenko, M. A. (2006). Inhibition of BMP  
853 signaling during zebrafish fin regeneration disrupts fin growth and scleroblast  
854 differentiation and function. *Developmental Biology*, 299(2), 438–454.  
855 <https://doi.org/10.1016/j.ydbio.2006.08.016>
- 856 Square, T. A., Sundaram, S., Mackey, E. J., & Miller, C. T. (2021). Distinct tooth regeneration  
857 systems deploy a conserved battery of genes. *EvoDevo*, 12(1), 4.  
858 <https://doi.org/10.1186/s13227-021-00172-3>
- 859 Stewart, S., Gomez, A. W., Armstrong, B. E., Henner, A., & Stankunas, K. (2014). Sequential  
860 and Opposing Activities of Wnt and BMP Coordinate Zebrafish Bone Regeneration. *Cell*  
861 *Reports*, 6(3), 482–498. <https://doi.org/10.1016/j.celrep.2014.01.010>
- 862 Taylor, E. B., & McPhail, J. D. (1986). Prolonged and burst swimming in anadromous and  
863 freshwater threespine stickleback, *Gasterosteus aculeatus*. *Canadian Journal of Zoology*,  
864 64(2), 416–420. <https://doi.org/10.1139/z86-064>
- 865 Vainio, S., Karavanova, I., Jowett, A., & Thesleff, I. (1993). Identification of BMP-4 as a signal  
866 mediating secondary induction between epithelial and mesenchymal tissues during early  
867 tooth development. *Cell*, 75(1), 45–58. [https://doi.org/10.1016/S0092-8674\(05\)80083-2](https://doi.org/10.1016/S0092-8674(05)80083-2)
- 868 Walker, J. A. (1997). Ecological morphology of lacustrine threespine stickleback *Gasterosteus*  
869 *aculeatus* L. (Gasterosteidae) body shape. *Biological Journal of the Linnean Society*,  
870 61(1), 3–50. <https://doi.org/10.1111/j.1095-8312.1997.tb01777.x>

- 871 Walker, J. A., & Bell, M. A. (2000). Net evolutionary trajectories of body shape evolution within  
872 a microgeographic radiation of threespine sticklebacks (*Gasterosteus aculeatus*). *Journal*  
873 *of Zoology*, 252(3), 293–302. <https://doi.org/10.1111/j.1469-7998.2000.tb00624.x>
- 874 Wang, Y., Li, L., Zheng, Y., Yuan, G., Yang, G., He, F., & Chen, Y. (2012). BMP Activity Is  
875 Required for Tooth Development from the Lamina to Bud Stage. *Journal of Dental*  
876 *Research*, 91(7), 690–695. <https://doi.org/10.1177/0022034512448660>
- 877 Wittkopp, P. J. (2012). Using Pyrosequencing to Measure Allele-Specific mRNA Abundance  
878 and Infer the Effects of Cis- and Trans-regulatory Differences. In V. Orgogozo & M. V.  
879 Rockman (Eds.), *Molecular Methods for Evolutionary Genetics* (Vol. 772, pp. 297–317).  
880 Humana Press. [https://doi.org/10.1007/978-1-61779-228-1\\_18](https://doi.org/10.1007/978-1-61779-228-1_18)
- 881
- 882



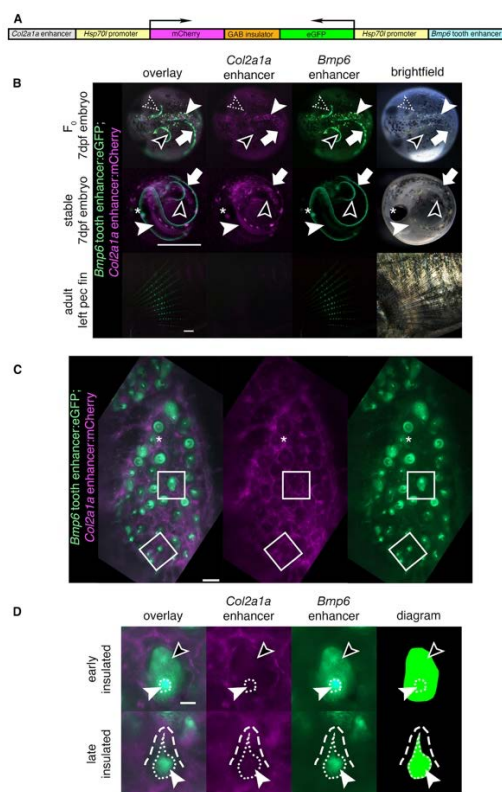

883  
884 **Figure 1. An insulated bicistronic construct reports separate expression patterns from two**  
885 **different enhancers.**

886 (A) Bicistronic construct with a *Col2a1a* enhancer and *Hsp70l* promoter driving mCherry and  
887 the freshwater *Bmp6* intronic tooth enhancer and *Hsp70l* promoter driving eGFP, separated by  
888 the mouse tyrosinase insulator (GAB). (B) Transgenic fish show a separation of domains in red  
889 and green overlay, red channel only, green channel only, and brightfield (left to right). Top: In 7  
890 days post fertilization (dpf) F<sub>0</sub> fish (dorsal view), insulation was observed in some but not all  
891 domains. Both mCherry and eGFP were observed in the same area in the right pectoral fin  
892 (dotted arrowhead), indicating incomplete or failed separation of domains, while in the other  
893 areas of the pectoral fin only eGFP was observed (black arrowhead). Within the notochord (solid  
894 white arrowhead), only mCherry was observed, while in the median fin (white arrow) only eGFP  
895 was observed, indicating insulation in both domains. Middle: In 7 dpf stable F<sub>1</sub> fish (lateral  
896 view), only eGFP was observed in the pectoral fins (black arrowhead) indicating successful  
897 insulation in those domains, while both fluorophores were detected in the median fin (white  
898 arrow) and in the notochord (solid white arrowhead) indicating a lack of insulation. Both  
899 fluorophores were detected in the lens of the eye (asterisk), a domain driven by the *Hsp70l*  
900 promoter. Bottom: in adult pectoral fins (lateral view), eGFP but not mCherry expression was  
901 detected. (C-D) Dorsal pharyngeal tooth plate (C) and representative teeth of early and late  
902 stages (D) from adult stable transgenic fish. (C) Insulator effectiveness was observed with eGFP  
903 restricted to predicted tooth domains and mCherry primarily present in the surrounding tissue. In  
904 some teeth, faint mCherry appeared to be expressed in the dental mesenchyme (asterisk). (D)  
905 eGFP expression was detected in the dental mesenchyme (solid arrowhead and extent of  
906 mesenchyme as white dotted line) and dental epithelium (black arrowhead) of developing teeth,  
907 while mCherry was expressed in the surrounding tissue (white dashed line outlines a mineralized  
908 tooth). Scale bars = 1mm (B), 100µm (C), 25µm (D).

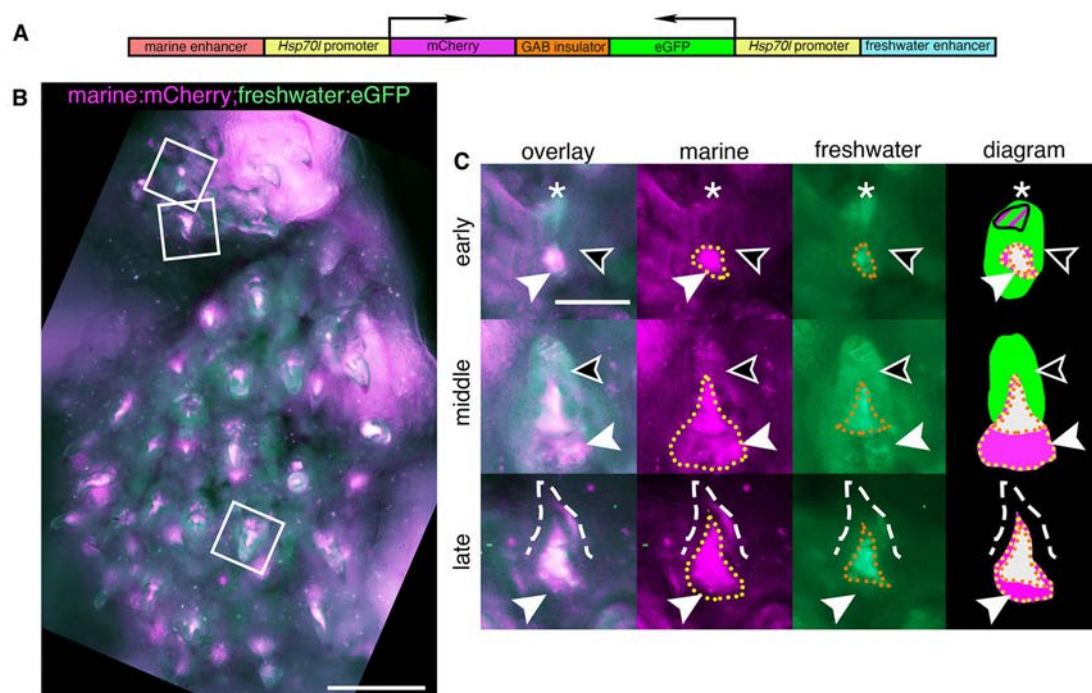

909  
910

911 **Figure 2. A bicistronic construct using a genetic insulator separates the expression domains**  
912 **of the marine and freshwater alleles of the *Bmp6* tooth enhancer.**

913 (A) Bicistronic construct with the marine allele of the intron 4 *Bmp6* enhancer/*Hsp70l* promoter  
914 driving mCherry and the freshwater allele/*Hsp70l* promoter driving eGFP separated by the  
915 mouse tyrosinase GAB insulator. (B) Dorsal pharyngeal tooth plate from a fish transgenic with  
916 construct (A), and representative teeth (white boxes) from early, middle, and late stages (early  
917 bell, late bell, and functional, respectively) (C). Early: epithelium expressed eGFP throughout  
918 (black arrowhead) while a concentrated tip (asterisk) was observed to contain both marine and  
919 freshwater activity. In the mesenchyme (white arrowhead) the marine allele had a more robust  
920 and larger expression domain (yellow dotted line) compared to the freshwater allele (orange  
921 dotted line). Middle: epithelium had freshwater expression while the marine allele continued to  
922 drive more robust expression in the mesenchyme compared to the freshwater allele. Late: As in  
923 the other stages the freshwater allele had a more restricted expression domain in mesenchyme of  
924 erupted mineralized teeth (dashed line). Scale bars = 200µm (B), 50µm (C).

925

926

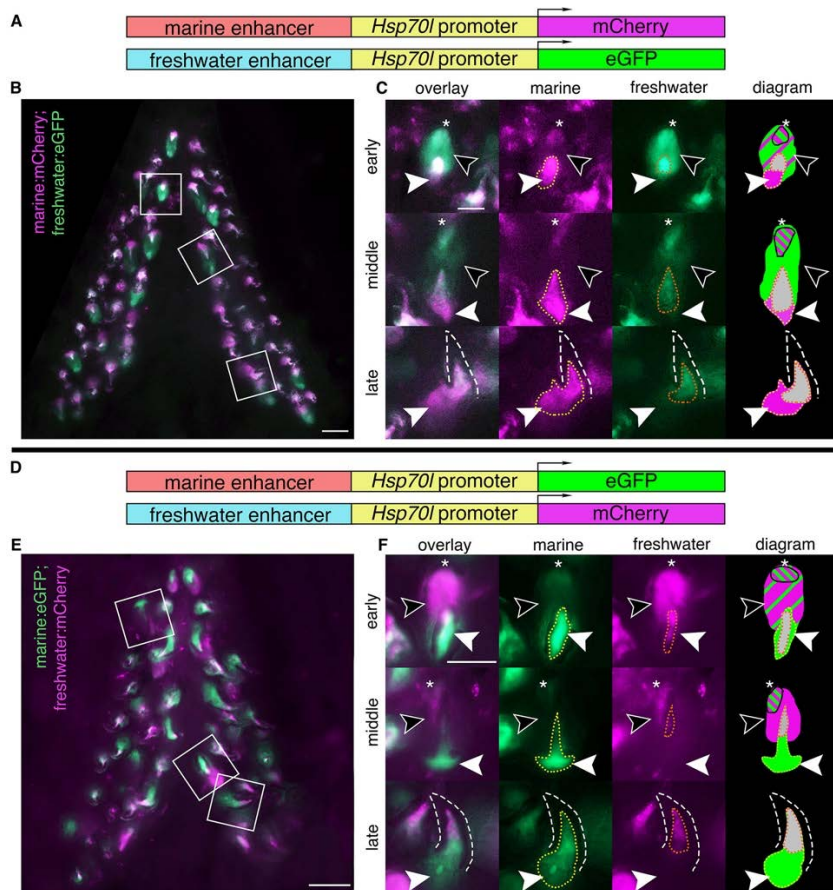

927

928 **Figure 3. Reduced mesenchymal and expanded epithelial expression of freshwater**  
 929 **enhancer relative to marine enhancer in developing teeth.**

930 Ventral pharyngeal tooth plates from fish doubly transgenic for two alleles of the *Bmp6* intron 4  
 931 enhancer driving two different reporter genes (A,D): the marine enhancer driving mCherry with  
 932 the freshwater enhancer driving eGFP (B,C) and the marine enhancer driving eGFP with the  
 933 freshwater enhancing driving mCherry (E,F). Bilateral ventral pharyngeal tooth plates (B,E) are  
 934 shown, next to representative teeth from three stages (C,F): early (early bell), middle (late bell),  
 935 and late (functional) highlighted by white boxes in B,E. (C,F) Early: freshwater and marine  
 936 enhancer drove expression in the epithelium (black arrowheads), with concentrated expression in  
 937 the tip (asterisk), and more overall epithelial expression from the freshwater enhancer. Both  
 938 enhancers also drove expression in the mesenchyme (solid white arrowhead) with a larger  
 939 expression domain of the marine allele (yellow dotted line) compared to the freshwater  
 940 allele (orange dotted line) seen in both genotypes. Middle: freshwater allele still drove expression  
 941 in the epithelium while marine allele had reduced or undetectable expression outside concentrated  
 942 tip. The marine allele drove more robust mesenchymal expression compared to the freshwater  
 943 allele. Late: marine allele drove robust expression in the mesenchyme compared to freshwater  
 944 allele in mineralized tooth (dashed line). Diagram: summary of tooth epithelial and mesenchymal  
 945 domains. The relative sizes of green and magenta hatched lines correspond to the approximate  
 946 relative strength of expression in the epithelium. Overlapping mesenchyme domain is grey, and  
 947 expanded marine mesenchyme is marked with white arrowhead. Scale bars = 100µm (B,D),  
 948 50µm (C, F).



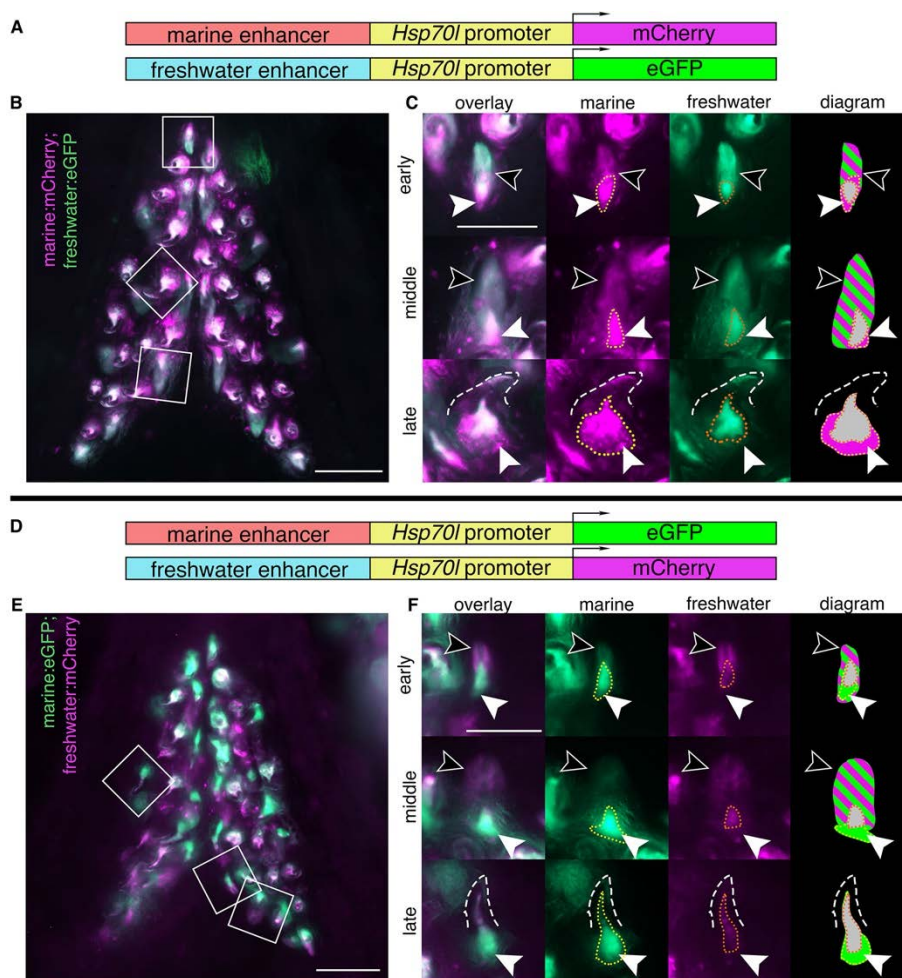

949  
950 **Figure 4. Marine and freshwater *Bmp6* enhancers drive more similar spatial patterns in**  
951 **younger fish.**

952 Ventral pharyngeal tooth plates from < 20 mm (pre-tooth number divergence) fish doubly transgenic for  
953 two alleles of the *Bmp6* intron 4 enhancer driving two different reporter genes (A,D): the marine enhancer  
954 driving mCherry with the freshwater enhancer driving eGFP (B,C) and the marine enhancer driving eGFP  
955 with the freshwater enhancing driving mCherry (E,F). Bilateral ventral tooth plates (B,E) are shown  
956 next to representative teeth from the three stages (C,F): early, middle, and late highlighted by  
957 white boxes in B,E. Early: both freshwater and marine enhancer drove expression robustly in the  
958 epithelium (black arrowheads), while both enhancers drove expression in the mesenchyme  
959 (white arrowheads), the marine enhancer drove a broader domain (yellow dotted line) compared  
960 to the freshwater enhancer (orange dotted line). Middle: both enhancers continued to drive  
961 robust, apparently similar levels of expression in the epithelium (black arrows). In the  
962 mesenchyme (white arrowheads) the domain of the freshwater enhancer was reduced compared  
963 to the marine allele. Late: marine allele continued to drive a broader domain within the  
964 mesenchyme of mineralized teeth (dashed line). The relative sizes of green and magenta hatched  
965 lines correspond to the approximate relative strength of expression in the epithelium.  
966 Overlapping mesenchyme domain is grey, and expanded marine mesenchyme is marked with  
967 white arrowhead. Scale bars = 100µm (B,E), 50µm (C, F).

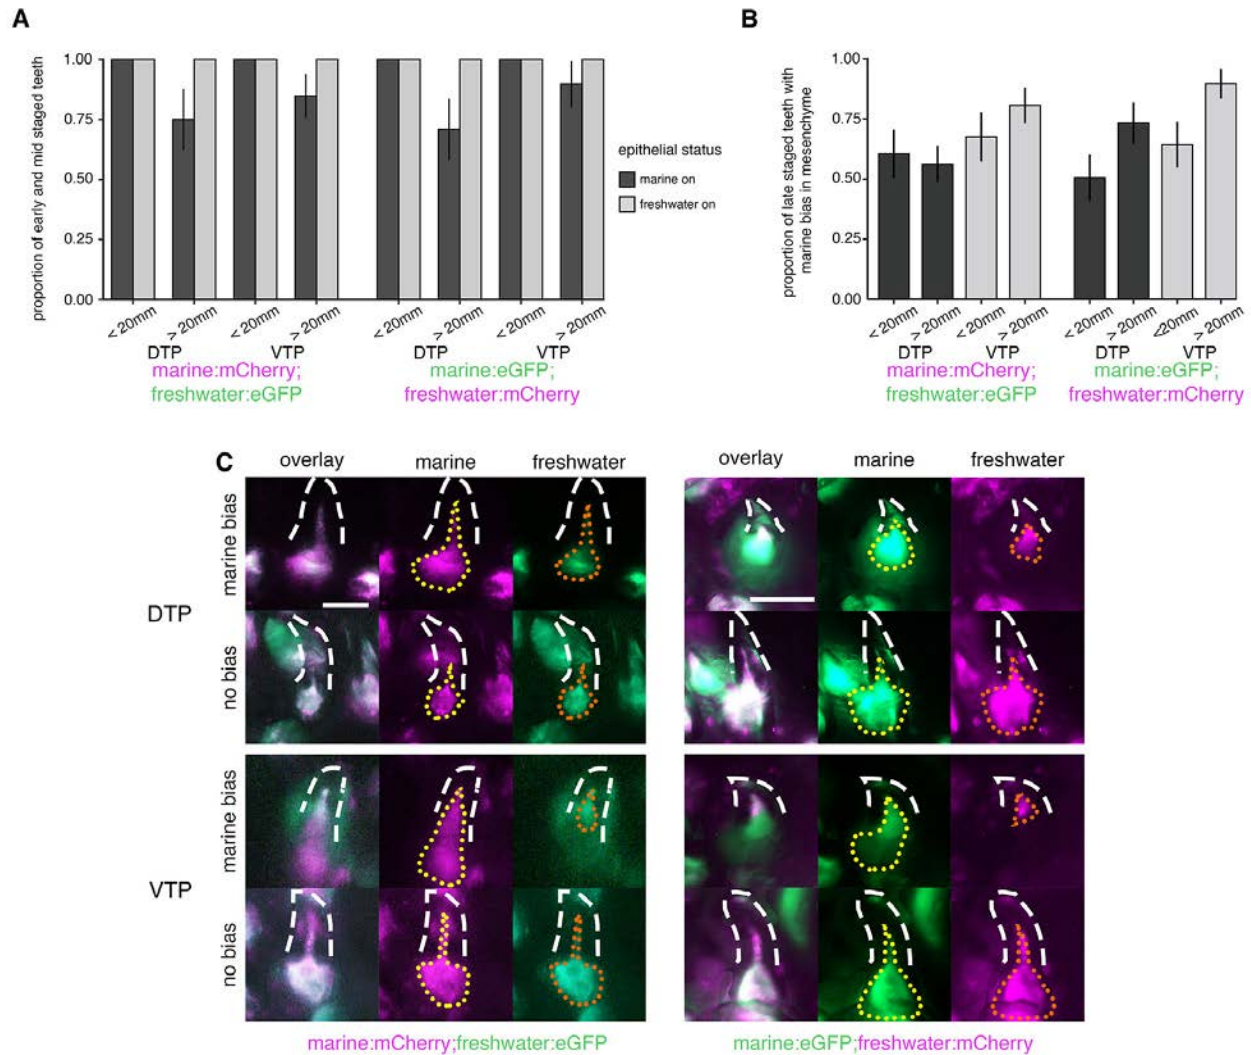

968  
 969 **Figure 5. Differences in enhancer activity vary based on dorsal vs. ventral tooth field, fish**  
 970 **total length, and epithelial vs. mesenchymal domain.** (A) In < 20mm total length (pre-tooth  
 971 number divergence) fish, the marine and freshwater alleles were expressed in the epithelium of  
 972 all developing tooth germs regardless of genotype, while in > 20 mm total length (post-tooth  
 973 number divergence) fish epithelial expression differences were consistent across tooth plates and  
 974 genotypes. The freshwater allele consistently drove expression in all tooth germs scored, while  
 975 the marine allele did not. (B) The proportion of erupted teeth that demonstrated an observed  
 976 mesenchymal bias of an expanded marine enhancer domain differed across dorsal and ventral  
 977 tooth plates (DTP and VTP, respectively), with more bias ventrally than dorsally. (C) Examples  
 978 of erupted teeth (white dashed lines) from both DTP and VTP that were scored as either having a  
 979 marine bias in the mesenchyme [if the freshwater enhancer mesenchymal domain (orange dotted line)  
 980 was more restricted compared to the marine enhancer domain (yellow dotted line)], or no  
 981 bias if the freshwater enhancer mesenchymal domain was equivalent to the marine enhancer  
 982 domain. Scale bars = 50µm (C).  
 983

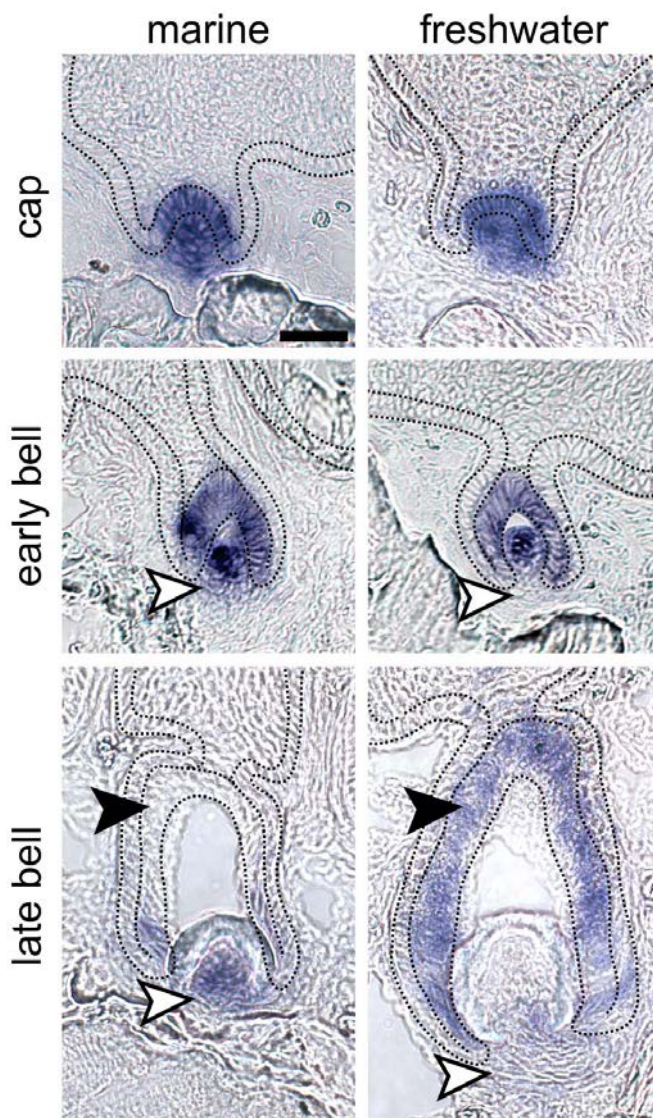

984  
985 **Figure 6. *In situ* hybridization illustrates that *Bmp6* expression shifts mirror enhancer**  
986 **activity differences in marine and freshwater backgrounds.**  
987 *In situ* hybridization (ISH) of *Bmp6* expression on thin sections of marine (left column) and  
988 freshwater (right column) homozygous backgrounds suggest that marine fish exhibit expanded  
989 mesenchymal expression at early and late bell stages (white arrowheads in middle and bottom  
990 rows, respectively), while freshwater fish exhibit relatively broader expression in the inner dental  
991 epithelium (IDE) of late bell stage teeth (black arrowheads in bottom row). No expression  
992 domain differences were observed in cap stage tooth germs (top row). Marine and freshwater  
993 strains are derived from population in Rabbit Slough, AK, USA (RABS), and Paxton Lake, BC,  
994 Canada (PAXB), respectively. Black dotted lines demarcate the basalmost layer of epithelium,  
995 adjacent to the basement membrane, which includes the inner and outer dental epithelium. See  
996 Figure S6 for DAPI counterstains and ISH images without markup. Scale bar = 20 $\mu$ m and  
997 applies to all panels.  
998



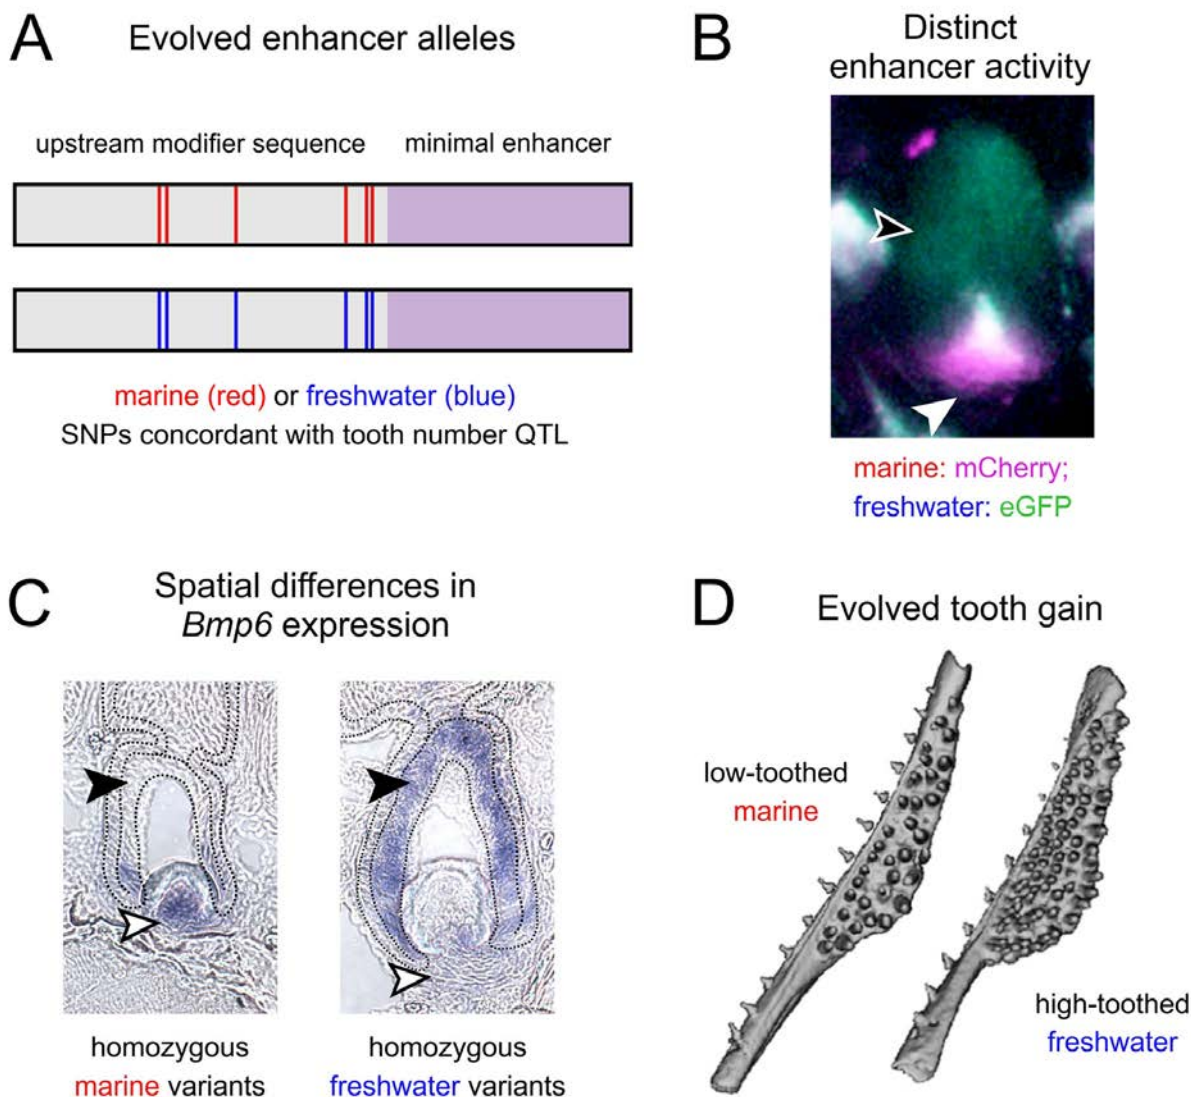

999  
1000 **Figure 7. A model for the role of *Bmp6* cis regulatory changes in underlying evolved tooth**  
1001 **gain in sticklebacks.**  
1002 **(A)** Quantitative trait loci (QTL) and fine mapping previously revealed variants in intron 4 of  
1003 *Bmp6* that were associated with evolved tooth gain in freshwater fish (Cleves et al., 2014, 2018;  
1004 Miller et al., 2014). These variants are adjacent to a previously characterized minimal enhancer  
1005 (lavender) that was shown to drive expression in tooth epithelium and mesenchyme (Cleves et  
1006 al., 2018). Six core single nucleotide polymorphisms (SNPs, depicted as red and blue lines  
1007 within the modifier sequence), showed complete concordance with a large effect tooth number  
1008 QTL (Cleves et al., 2018). **(B)** Marine and freshwater enhancers have different spatial activity,  
1009 with the derived freshwater allele driving less mesenchymal expression, but more epithelial  
1010 expression relative to the marine allele. **(C)** Consistent with the different enhancer activity, *Bmp6*  
1011 expression by *in situ* hybridization is reduced in the mesenchyme but expanded in the epithelium  
1012 in freshwater teeth relative to marine teeth. **(D)** We hypothesize that the enhancer alleles (A)  
1013 have spatially shifted enhancer activity (B), resulting in shifts in *Bmp6* expression overall (C),  
1014 and evolved tooth gain in freshwater fish (D).

1015 Supplemental materials

1016 Supplemental figures

```

marine      1  GAGAGCATCCGTCTTGTGGG-----GGGGAACAAAATGTGGACGTTGCACCCAGTTTCTGTTGGGCGCAGC
freshwater  1  GAGAGCATCCGTCTTGTGGGGGGGAGGGTGGGGGGGAAACAAAATGTGGACGTTGCACCCAGTTTCTGTTGGGCGCAGC

marine      69  GCTGTAGTAC--AGCTCAGGCCACCACAGCGGCAACTAAAAGGAGTATTTCGCCAATAATTCACCCCGATACGTCCTTT
freshwater  81  GCTGTAGTACATCAGCTCAGGCCACCACAGCGGCAACTAAAAGGAGTATTTCGCCAATAATTCACCCCGATACGTCCTTT

marine      146  TTCCCAAGAAAAACGTGACATCTTAAGGCCGGAAGGTACGAACATGTTTGTTCGTTTCAAGTGCCTCTCGTGGGCATTAACCTC
freshwater  161  TTCCCAAGAAAAACGTGACATCTTAAGGCCGGAAGGTACGAACATGTTTGTTCGTTTCAAGTGCCTCTCGTGGGCATTAACCTC

marine      226  CACATCGGGGCATTTAAAACAAGCGTGAGTTACTGTGTGCTTTCTAAAAATAGTTTCCTCTCGGACCAAAACGACACAC
freshwater  241  CACATCGGGCAATTTAAAACAAGCGTGAGTTACTGTGTGCTTTCTAAAAATAGTTTCCTCTCGGACCAAAACGACACAC

marine      306  TCCGGACCTGTGTGGTTGACCACGGCTCTGATTTTACTGCATCTTGTTTAGTTTATTAACATTTTGTCTTTCATTTTTTCAT
freshwater  321  TCCGGACTGTGTGTGGTTGACCACGGCTCTGATTTTACTGCATCTTGTTTAGTTTATTAACATTTTGT--CATTTTTTCAT

marine      386  TTCCTACATTTGGCTGCTCGGCTTTCGCTGTGACTATTGACTGAAATGCCTCTTGTCTGTGTAATACTGGAACCTAA
freshwater  398  TTCCTACATTTGGCTGCTCGGCTTTCGCTGTGACTATTGACTGAAATGCCTCTTGTCTGTGTAATACTGGAACCTAA

marine      466  CTTTGCTACTGTACTCGCTTTGAGGTCCTGGGACCGGTTATTTCTCATTTTCACATTTTTATTGAGCTGGATTAAAA
freshwater  478  CTTTGCTACTGTACTCGCTTTGAGGTCCTGGGACCGGTTATTTCTCATTTTCACATTTTTATTGAGCTGGATTAAAA

marine      546  TAACATGTGATAATAAATGCCTTCCAGGTGAGAGAATTCAACAAAAGAGTTCTATCAAGTCTGAGATGAGGGTGACTTC
freshwater  558  TAACATGTGATAATAAATGCCTTCCAGGTGAGAGAATTCAACAAAAGAGTTCTATCAAGTCTGAGATGAGGGTGACTTC

marine      626  CGTTTTTCACATTTGCTCACAAGGCAGACAATTAGACACTCCTTCTAGTCTTAGTTAGTTCTTTCTTAAACTCCGACG
freshwater  638  CGTTTTTCACATTTGCTCACAAGGCAGACAATTAGACACTCCTTCTAGTCTTAGTTAGTTCTTTCTTAAACTCCGACG

marine      706  TGGCTTGGATGTGTGAATGCTTTGTAGGATGTAGCTTCCGCTCGCTCTGGGCGTGCTGTGTGCGCGCTGGAAAA
freshwater  718  TGGCTTGGATGTGTGAATGCTTTGTAGGATGTAGCTTCCGCTCGCTCTGGGCGTGCTGTGTGCGCGCTGGAAAA

marine      786  TGCTGCGGTGTACCTTGCCAAAAGAACAAATGCACACCTTAAAGGTAATTTGGGGTTTTGTGGGCGAAGACGGCCGAGG
freshwater  798  TGCTGCGGTGTACCTTGCCAAAAGAACAAATGCACACCTTAAAGGTAATTTGGGGTTTTGTGGGCGAAGACGGCCGAGG

marine      866  AGGTAATGGGAGTGGGTTGGGCTGCGGCTGTGGGGGAAGTTAACCAACCATCCGGGGAAGGAGAATCGCGTCCCGGCTGC
freshwater  878  AGGTAATGGGAGTGGGTTGGGCTGCGGCTGTGGGGGAAGTTAACCAACCATCCGGGGAAGGAGAATCGCGTCCCGGCTGC

marine      946  AGAGGCGGCCTGTAATTAGGCCTAGCCAGTCATTAGCTGCGCGGCTAAAAGGCCGACCGCGCTAACAGCCTCGCTTAAAG
freshwater  958  AGAGGCGGCCTGTAATTAGGCCTAGCCAGTCATTAGCTGCGCGGCTAAAAGGCCGACCGCGCTAACAGCCTCGCTTAAAG

marine      1026  AATTATAAATAACACGGCGCTCGGGCCAGCCATGTTTTTTCATCTGTCTCTCTCTCTCCCTCCGCTCCTCCTCATCCT
freshwater  1038  AATTATAAATAACACGGCGCTCGGGCCAGCCATGTTTTTTCATCTGTCTCTCTCTCTCCCTCCGCTCCTCCTCATCCT

marine      1106  CCGCGCTGCCTCCCAACCCGACCTTTTGTTTACCGTCGGGGTAATTAGACATGGCGGAGCTCCCTCGCAGGGTTAATAA
freshwater  1118  CCGCGCTGCCTCCCAACCCGACCTTTTGTTTACCGTCGGGGTAATTAGACATGGCGGAGCTCCCTCGCAGGGTTAATAA

marine      1186  CCTCTGTGATGAAAGACGGGAAGAAAGATAAACTTCAGTAGTAGTGGTGGGAGAGGGGAGGTGGGGCGGGAGAGG
freshwater  1198  CCTCTGTGATGAAAGACGGGAAGAAAGATAAACTTCAGTAGTAGTGGTGGGAGAGGGGAGGTGGGGCGGGAGAGG

marine      1266  CCATCAGGACTCT
freshwater  1278  CCATCAGGACTCT

```

1017

1018 **Figure S1. Sequence alignment of marine and freshwater alleles of *Bmp6* tooth enhancer**  
1019 Six core single nucleotide polymorphisms (green) concordant with the presence or absence of a  
1020 large effect tooth number QTL lie upstream of a ~511 bp minimal *Bmp6* tooth enhancer (start  
1021 and end in yellow). Other polymorphisms (white) are not concordant with the presence or  
1022 absence of the tooth QTL (Cleves et al., 2018).  
1023



1024

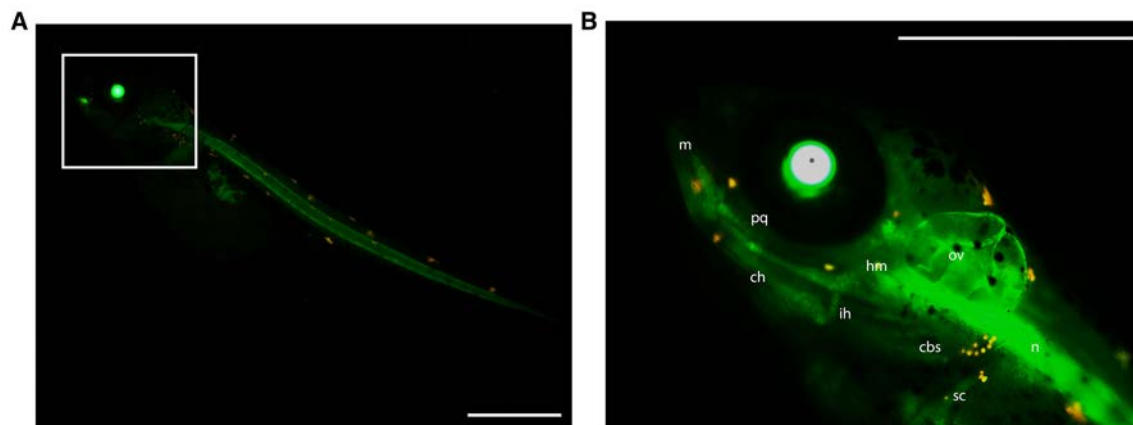

1025

1026 **Figure S2. A Col2a1 enhancer drives reporter expression in craniofacial cartilage and**  
1027 **notochord in developing stickleback embryos. (A)** In a ten day post-fertilization embryo,  
1028 reporter expression was observed in notochord (n) and **(B)** craniofacial cartilage including  
1029 Meckel's (m), ceratohyal (ch), interhyal (ih), ceratobranchials (cbs), palatoquadrate (pq), and the  
1030 hyosymplectic (hm). Expression was also seen in the scapulocoracoid (sc), and otic vesicle (ov).  
1031 Scale bars = 500µm.

1032

1033

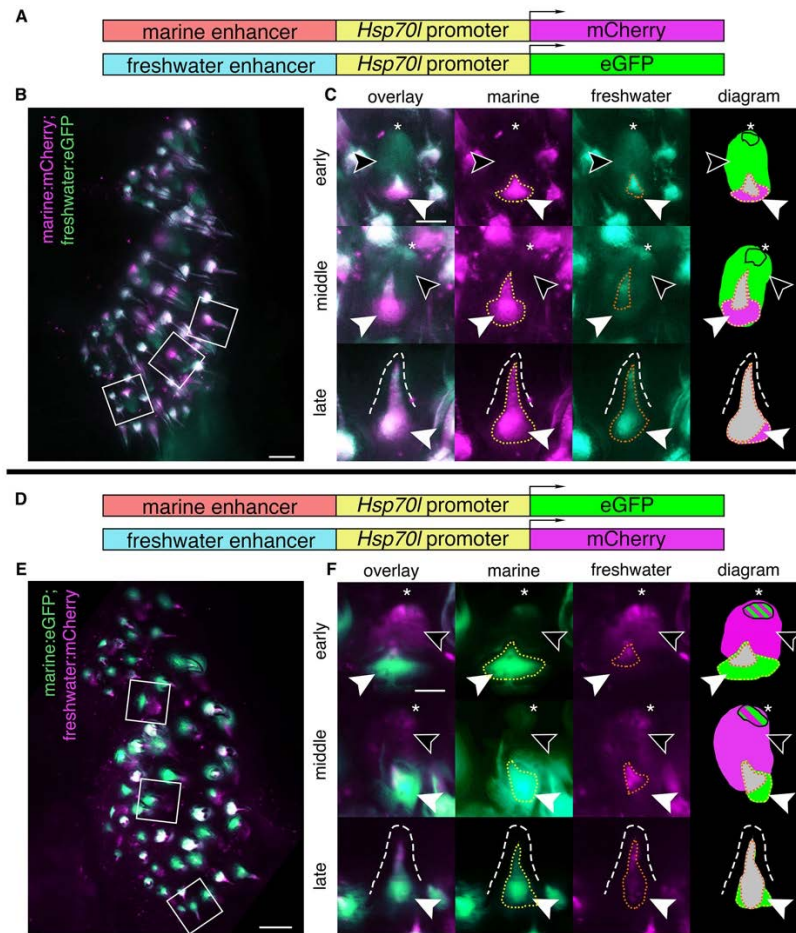

1034

1035 **Figure S3. Marine and freshwater *Bmp6* enhancers drive different spatial patterns in**  
 1036 **dorsal pharyngeal teeth.**

1037 Dorsal pharyngeal tooth plates from fish doubly transgenic for two alleles of the *Bmp6* intron 4  
 1038 enhancer driving two different reporter genes (A,D): the marine enhancer driving mCherry with  
 1039 the freshwater enhancer driving eGFP (B,C) and the marine enhancer driving eGFP with the  
 1040 freshwater enhancing driving mCherry (E,F). Unilateral dorsal pharyngeal tooth plates (B,E) are  
 1041 shown, next to representative teeth from three stages (C,F): early, middle, and late highlighted  
 1042 by white boxes in B,E. (C,F) Early: freshwater enhancer drove expression in the epithelium  
 1043 (black arrowheads), with concentrated expression in the tip (asterisk), while the marine enhancer  
 1044 did not reliably drive expression in the epithelium, but was observed in the distal tip (F) in some  
 1045 instances. Both enhancers also drove expression in the mesenchyme (solid white arrowhead)  
 1046 with a larger expression domain of the marine allele (yellow dotted line) compared to the  
 1047 freshwater allele (orange dotted line). Middle: freshwater allele still drove expression in the  
 1048 epithelium while the marine allele was restricted to the distal tip. The marine allele drove more  
 1049 robust mesenchymal expression compared to the freshwater allele. Late: marine allele drives  
 1050 robust expression in the mesenchyme compared to freshwater allele in mineralized tooth (dashed  
 1051 line). Diagram: summary of tooth epithelial and mesenchymal domains. The relative sizes of  
 1052 green and magenta hatched lines correspond to the approximate relative strength of expression in  
 1053 the epithelium. Overlapping mesenchyme domain is grey, and expanded marine mesenchyme is  
 1054 marked with white arrowhead. Scale bars = 100µm (B,E), 50µm (C, F).

1055

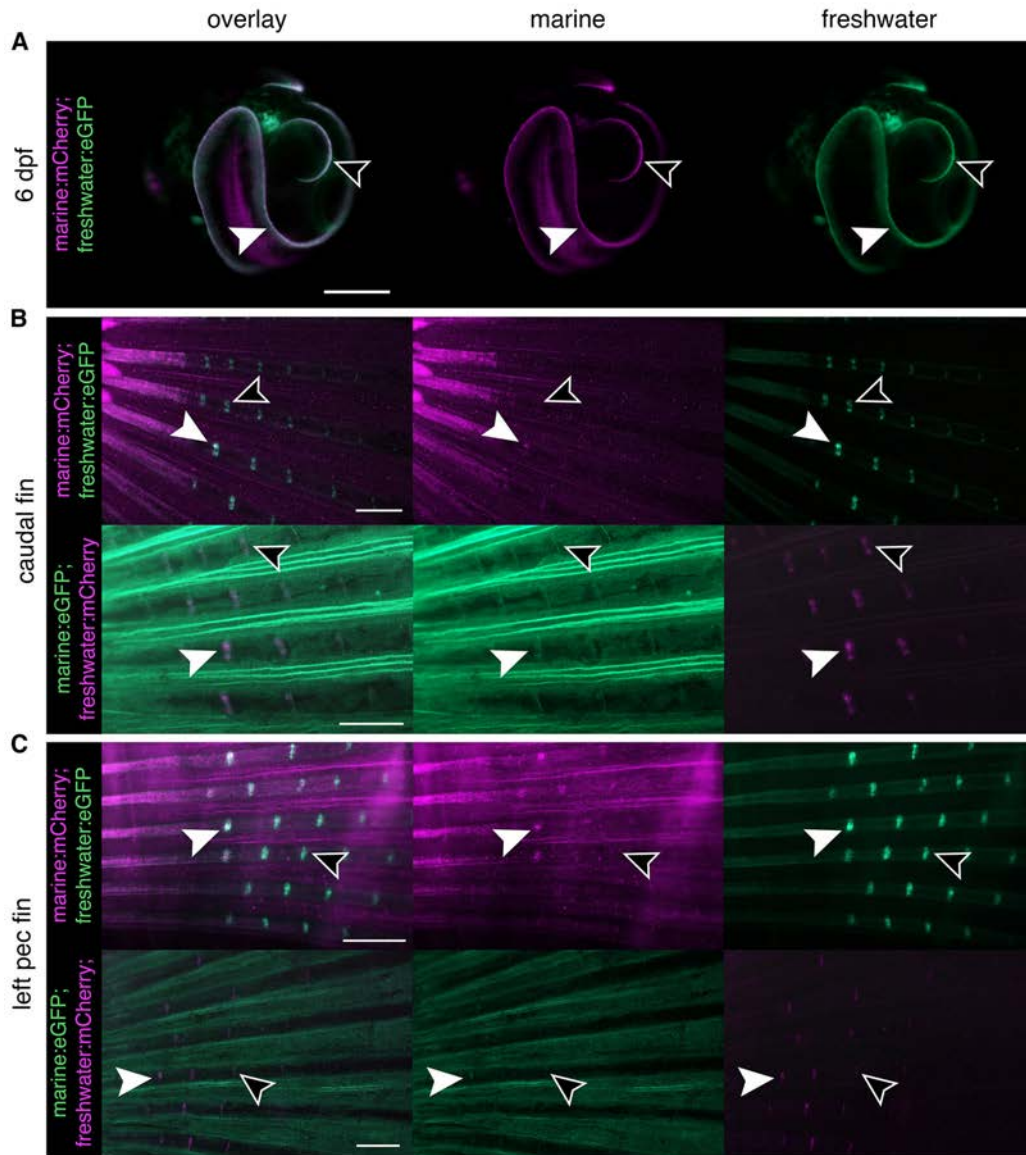

1056

1057

1058

1059

1060

1061

1062

1063

1064

1065

1066

1067

**Figure S4. Freshwater allele drives expression in more intersegmental joints of both pectoral and caudal fins compared to the marine allele.**

(A) In young, pre-hatching fish (6 dpf) the marine and freshwater enhancers drive expression in identical patterns in the developing fin margins of the pectoral fins (solid white arrowhead) and median fin (black arrowhead). (B) In adult caudal fins the more basal intersegmental joints were observed to have activity from both the marine and freshwater alleles (solid white arrowhead) while more distal joints were observed to only have freshwater enhancer activity (black arrowhead). The pattern was observed across both enhancer/reporter pairings. (C) Left pectoral fins from adults were observed to have activity from both enhancers in more basal intersegmental joints (solid white arrowheads) while only the freshwater allele was observed to have activity in more distal joints (empty arrowheads). Scale bars = 0.5 mm.

1068

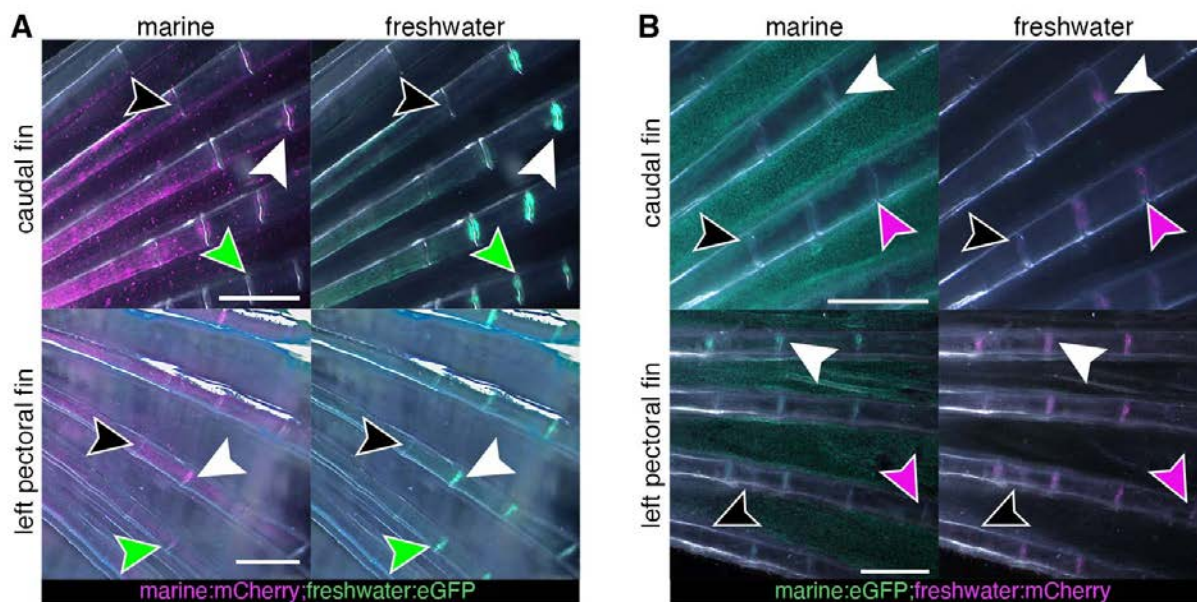

1069

1070

**Figure S5. Fin expression patterns of both alleles change over developmental time.**

1071

(A) Caudal and pectoral fins with the freshwater enhancer driving eGFP and marine enhancer driving mCherry. Only the freshwater enhancer is active in more distal joints (green arrowhead)

1072

while in more basal joints both enhancers are active (solid white arrowhead). No enhancer

1073

activity was observed in the most basal joints (black arrowhead). (B) Caudal and pectoral fins

1074

with the freshwater enhancer driving mCherry and marine enhancer driving eGFP. Similar to

1075

(A), the freshwater allele is active in more distal joints than the marine allele (purple arrowhead),

1076

more basal joints exhibit activity from both enhancers (solid white arrowhead). In the most basal

1077

joints, activity from either enhancer was not observed (black arrowhead). Scale bars = 0.5mm.

1078

1079

1080



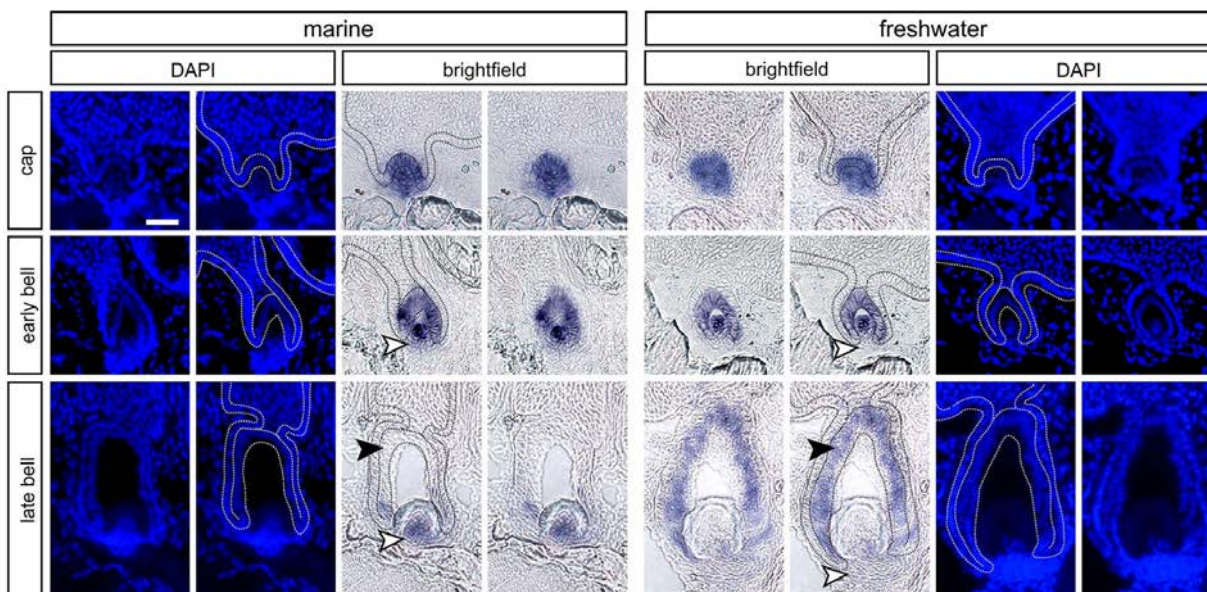

1081  
1082 **Figure S6. DAPI counterstain distinguishes between epithelial and mesenchymal tissues on**  
1083 **thin sections.** Inner four columns show brightfield *in situ* hybridization (ISH) images for *Bmp6*  
1084 expression on marine (left) and freshwater (right) backgrounds, innermost columns with no  
1085 annotations, adjacent to the same images with annotations (as presented in Figure 6). The  
1086 outermost four columns show DAPI counterstains of the same sections, again shown both with  
1087 and without annotations. The first row shows a cap stage tooth, the second row shows an early  
1088 bell stage tooth, and the third row shows a late bell stage tooth. All dotted lines (black in  
1089 brightfield images, white in DAPI images) demarcate the basalmost layer of epithelium in the  
1090 tooth field, which is contiguous with the inner and outer dental epithelia of tooth germs. Regions  
1091 where differences in expression were detected are marked with arrowheads: white arrowheads  
1092 mark expanded mesenchymal expression in marine relative to freshwater, while black  
1093 arrowheads mark expanded epithelial expression in freshwater relative to marine (as shown in  
1094 Figure 8). Scale bar = 20  $\mu$ m and applies to all panels.

1095 **Supplemental tables**

1096 **Table S1. Insulator scores for bicistronic *Col2a1a*:mCh;*Bmp6* tooth enhancer:eGFP**  
1097 **transgene**

| Domain        | “0”- apparent no insulation | “1” – partial insulation observed | “2”- apparent complete insulation | Total fluorescence positive domains |
|---------------|-----------------------------|-----------------------------------|-----------------------------------|-------------------------------------|
| Left pec fin  | 24                          | 13                                | 28                                | 65                                  |
| Right pec fin | 28                          | 14                                | 21                                | 63                                  |
| Median fin    | 34                          | 23                                | 29                                | 86                                  |
| Notochord     | 9                           | 1                                 | 3                                 | 13                                  |
| Total         | 95                          | 51                                | 81                                | 227                                 |

1098 For each reporter positive domain in F<sub>0</sub> fish with *Col2a1a*:mCh;*Bmp6* tooth enhancer:eGFP  
1099 transgene, a score of 0-2 was given for observed non, partial, or complete insulation.

1100

1101

1102 **Table S2. Insulator scores for bicistronic *Col2a1a*:eGFP;*Bmp6* tooth enhancer:mCh**  
1103 **transgene**

| Domain        | “0”- apparent no insulation | “1” – partial insulation observed | “2”- apparent complete insulation | Total fluorescence positive domains |
|---------------|-----------------------------|-----------------------------------|-----------------------------------|-------------------------------------|
| Left pec fin  | 12                          | 2                                 | 4                                 | 18                                  |
| Right pec fin | 6                           | 4                                 | 3                                 | 13                                  |
| Median fin    | 15                          | 4                                 | 3                                 | 22                                  |
| Notochord     | 5                           | 0                                 | 5                                 | 10                                  |
| Total         | 38                          | 10                                | 15                                | 63                                  |

1104 For each reporter positive domain in F<sub>0</sub> fish with *Col2a1a*:mCh;*Bmp6* tooth enhancer:eGFP  
1105 transgene, a score of 0-2 was given for observed non, partial, or complete insulation.

1106

1107

1108 **Table S3. Epithelial expression of enhancer by tooth plate, tooth stage, and genotype.**

| tooth plate | time point      | stage | freshwater positive (N/%) | marine positive (N/%) | total teeth in stage | genotype                       |
|-------------|-----------------|-------|---------------------------|-----------------------|----------------------|--------------------------------|
| DTP         | pre-divergence  | early | 20/100%                   | 20/100%               | 20                   | freshwater:eGFP;marine:mCherry |
| DTP         | post-divergence | early | 29/100%                   | 24/82.8%              | 29                   | freshwater:eGFP;marine:mCherry |
| DTP         | pre-divergence  | mid   | 16/100%                   | 16/100%               | 16                   | freshwater:eGFP;marine:mCherry |
| DTP         | post-divergence | mid   | 15/100%                   | 9/60.0%               | 15                   | freshwater:eGFP;marine:mCherry |
| VTP         | pre-divergence  | early | 19/100%                   | 19/100%               | 19                   | freshwater:eGFP;marine:mCherry |
| VTP         | post-divergence | early | 23/100%                   | 20/87.0%              | 23                   | freshwater:eGFP;marine:mCherry |
| VTP         | pre-divergence  | mid   | 22/100%                   | 22/100%               | 22                   | freshwater:eGFP;marine:mCherry |
| VTP         | post-divergence | mid   | 36/100%                   | 30/83.3%              | 36                   | freshwater:eGFP;marine:mCherry |
| DTP         | pre-divergence  | early | 13/100%                   | 13/100%               | 13                   | freshwater:mCherry;marine:eGFP |
| DTP         | post-divergence | early | 24/100%                   | 18/75.0%              | 24                   | freshwater:mCherry;marine:eGFP |
| DTP         | pre-divergence  | mid   | 16/100%                   | 16/100%               | 16                   | freshwater:mCherry;marine:eGFP |
| DTP         | post-divergence | mid   | 24/100%                   | 16/66.7%              | 24                   | freshwater:mCherry;marine:eGFP |
| VTP         | pre-divergence  | early | 16/100%                   | 16/100%               | 16                   | freshwater:mCherry;marine:eGFP |
| VTP         | post-divergence | early | 23/100%                   | 21/91.3%              | 23                   | freshwater:mCherry;marine:eGFP |
| VTP         | pre-divergence  | mid   | 13/100%                   | 13/100%               | 13                   | freshwater:mCherry;marine:eGFP |
| VTP         | post-divergence | mid   | 16/100%                   | 14/87.5%              | 16                   | freshwater:mCherry;marine:eGFP |

1109 For each tooth field (dorsal or ventral tooth plate, DTP or VTP), stage (pre-divergence = <20  
 1110 mm fish length, post-divergence = >20 mm fish length, tooth stage [early or middle (mid), see  
 1111 Methods], the number (N), percentage (%) of detected epithelial expression are listed, along with  
 1112 total number of teeth and genotype of transgene.  
 1113

1114 **Table S4. Mesenchymal bias of enhancer expression by tooth plate, tooth stage, and**  
 1115 **genotype.**  
 1116

| tooth plate | time point      | stage | unbiased mesenchymal expression (N/%) | biased mesenchymal expression (N/%)         | Total teeth in stage | genotype                       |
|-------------|-----------------|-------|---------------------------------------|---------------------------------------------|----------------------|--------------------------------|
| DTP         | pre-divergence  | early | 3/15%                                 | 17/85%                                      | 20                   | freshwater:eGFP;marine:mCherry |
| DTP         | post-divergence | early | 1/3.4%                                | 28/96.6%                                    | 29                   | freshwater:eGFP;marine:mCherry |
| DTP         | pre-divergence  | mid   | 2/12.5%                               | 14/87.5%                                    | 16                   | freshwater:eGFP;marine:mCherry |
| DTP         | post-divergence | mid   | 0/0%                                  | 15/100%                                     | 15                   | freshwater:eGFP;marine:mCherry |
| DTP         | pre-divergence  | late  | 36/39.6%                              | 55/60.4%                                    | 91                   | freshwater:eGFP;marine:mCherry |
| DTP         | post-divergence | late  | 46/43.8%                              | 59/56.2%                                    | 105                  | freshwater:eGFP;marine:mCherry |
| VTP         | pre-divergence  | early | 4/21.1%                               | 15/88.9%                                    | 19                   | freshwater:eGFP;marine:mCherry |
| VTP         | post-divergence | early | 0/0%                                  | 23/100%                                     | 23                   | freshwater:eGFP;marine:mCherry |
| VTP         | pre-divergence  | mid   | 2/9.1%                                | 20/90.9%                                    | 22                   | freshwater:eGFP;marine:mCherry |
| VTP         | post-divergence | mid   | 0/0%                                  | 36/100%                                     | 36                   | freshwater:eGFP;marine:mCherry |
| VTP         | pre-divergence  | late  | 26/32.5%                              | 54/67.5%                                    | 80                   | freshwater:eGFP;marine:mCherry |
| VTP         | post-divergence | late  | 21/19.4%                              | 87/80.6%                                    | 108                  | freshwater:eGFP;marine:mCherry |
| DTP         | pre-divergence  | early | 0/0%                                  | 13/100%                                     | 13                   | freshwater:mCherry;marine:eGFP |
| DTP         | post-divergence | early | 0/0%                                  | 24/100%                                     | 24                   | freshwater:mCherry;marine:eGFP |
| DTP         | pre-divergence  | mid   | 1/6.3%                                | 15/93.7%                                    | 16                   | freshwater:mCherry;marine:eGFP |
| DTP         | post-divergence | mid   | 0/0%                                  | 24/100%                                     | 24                   | freshwater:mCherry;marine:eGFP |
| DTP         | pre-divergence  | late  | 51/49.5%                              | 52/50.5%                                    | 103                  | freshwater:mCherry;marine:eGFP |
| DTP         | post-divergence | late  | 27/26.7%                              | 74/73.3%                                    | 101                  | freshwater:mCherry;marine:eGFP |
| VTP         | pre-divergence  | early | 0/0%                                  | 16/100%                                     | 16                   | freshwater:mCherry;marine:eGFP |
| VTP         | post-divergence | early | 0/0%                                  | 23 (2 Freshwater [8.7%], 21 Marine [91.3%]) | 23                   | freshwater:mCherry;marine:eGFP |
| VTP         | pre-divergence  | mid   | 0/0%                                  | 13/100%                                     | 13                   | freshwater:mCherry;marine:eGFP |
| VTP         | post-divergence | mid   | 0/0%                                  | 16/100%                                     | 16                   | freshwater:mCherry;marine:eGFP |
| VTP         | pre-divergence  | late  | 35/35.7%                              | 63/64.3%                                    | 98                   | freshwater:mCherry;marine:eGFP |
| VTP         | post-divergence | late  | 10/10.3%                              | 87 (1 Freshwater [1%], 86 [88.7%] Marine)   | 97                   | freshwater:mCherry;marine:eGFP |

1117 For each tooth field (dorsal or ventral tooth plate, DTP or VTP), stage (pre-divergence = <20  
 1118 mm fish length, post-divergence = >20 mm fish length, tooth stage [early or middle (mid), see  
 1119 Methods], the number (N), percentage (%) of detected mesenchymal bias in expression are  
 1120 listed, along with total number of teeth and genotype of transgene.  
 1121  
 1122

1123

1124

1125



1126 **Supplemental methods**

1127 Multiple fluorescent reporter transgenes were assembled using the methods and primers as  
 1128 described below. Component abbreviations below are as follows: *Hsp70l* = stickleback *Hsp70l*  
 1129 promoter (O’Brown et al., 2015); GAB = mouse tyrosinase insulator (Bessa et al., 2009);  
 1130 *Col2a1a* = *Col2a1a R2* enhancer (Dale & Topczewski, 2011).

1131

1132 ***Col2a1a* containing insulator construct #1**

1133 ***Col2a1a* enhancer/*Hsp70l*→mCh+GAB+eGFP←*Hsp70l/Bmp6* enhancer**

1134 The components of GAB, eGFP, and *Hsp70l/Bmp6* enhancer were amplified using primers  
 1135 MDS126/136, MDS137/89, and MDS90/131 respectively. The amplicons were combined with a  
 1136 modified plasmid (pT2He, modified to contain only polyclonal sites) linearized with *NdeI* and  
 1137 *BamHI* as well as Gibson Assembly master mix (NEB #E2611L) and incubated following the  
 1138 manufacturer’s protocol. The resulting plasmid was digested with *NdeI* and *Bsu36I* and the  
 1139 fragments for the second half, *Col2a1a* enhancer/*Hsp70l* and mCherry, were amplified with  
 1140 MDS138/139 and MDS140/141 respectively. The plasmid and amplicons were combined with  
 1141 Gibson Assembly master mix and incubated following the manufacturer’s protocol.

| Primer name | Primer sequence                                       | description                                    |
|-------------|-------------------------------------------------------|------------------------------------------------|
| MDS126      | cagataggcccctaaggactagtcatatgCTCACTATAGGGCGAATGGAGCTC | GAB forward                                    |
| MDS136      | atgtggtatggctgatGCCGCCAGTGTGATGGATATC                 | GAB reverse                                    |
| MDS137      | ccatcacactggcggcATCAGCCATACCACATTTGTAGAGG             | eGFP forward                                   |
| MDS89       | tgcagtcgacggtGGTCGCCACCATGGTGAG                       | eGFP reverse                                   |
| MDS90       | catggtggcgaccACCGTCGACTGCAGGAAAAAAAAAAC               | <i>Bmp6</i> + <i>Hsp70l</i> forward            |
| MDS131      | taaataaagattcattcaagatctggtatccGAGAGCATCCGTCTTGTGGG   | <i>Bmp6</i> + <i>Hsp70l</i> reverse            |
| MDS138      | acacagccagataggcccctaaggCGCTCCTTGAGGGTTTGAG           | <i>Col2a1a</i> enhancer+ <i>Hsp70l</i> forward |
| MDS139      | ggtggcgaccGTCGACTGCAGGAAAAAAAAAAC                     | <i>Col2a1a</i> enhancer+ <i>Hsp70l</i> reverse |
| MDS140      | tgcagtcgacGGTCGCCACCATGGTGAG                          | mCh forward                                    |
| MDS141      | cattgcacctatgtgacatatgATCAGCCATACCACATTTGTAGAGG       | mCh reverse                                    |

1142 Primers used to amplify components of the *Col2a1a*:mCherry;*Bmp6* tooth enhancer:eGFP  
 1143 insulator containing bicistronic construct

1144

1145 ***Col2a1a* containing insulator construct #2**

1146 ***Col2a1a* enhancer/*Hsp70l*→eGFP+GAB+mCh←*Hsp70l*/*Bmp6* enhancer**

1147 The assembly of the second *Col2a1a* containing bicistronic construct is nearly identical to the  
 1148 first. All steps are the same except primers MDS137/89 were used to amplify mCherry in the  
 1149 first assembly step and primers MDS140/141 were used to amplify eGFP in the second assembly  
 1150 step. Due to identical sequence at the transition from *Hsp70l* to mCherry/eGFP and at the 3' end  
 1151 of the SV40 polyA sequence for each reporter, the same primers can be used to amplify both off  
 1152 of the original reporter plasmids.

| Primer name | Primer sequence                                       | description                                    |
|-------------|-------------------------------------------------------|------------------------------------------------|
| MDS126      | cagataggcccctaaggactagtcatatgCTCACTATAGGGCGAATGGAGCTC | GAB forward                                    |
| MDS136      | atgtggtatggctgatGCCGCCAGTGTGATGGATATC                 | GAB reverse                                    |
| MDS137      | ccatcacactggcggcATCAGCCATACCACATTTGTAGAGG             | mCh forward                                    |
| MDS89       | tgcagtcgacggtGGTCGCCACCATGGTGAG                       | mCh reverse                                    |
| MDS90       | catggtggcgaccACCGTCGACTGCAGGAAAAAAAAAAC               | <i>Bmp6</i> + <i>Hsp70l</i> forward            |
| MDS131      | taaataaagattcattcaagatctggatccGAGAGCATCCGTCTTGTGGG    | <i>Bmp6</i> + <i>Hsp70l</i> reverse            |
| MDS138      | acacaggccagataggcccctaaggCGCTCCTTGAGGGTTGAG           | <i>Col2a1a</i> enhancer+ <i>Hsp70l</i> forward |
| MDS139      | ggtggcgaccGTCGACTGCAGGAAAAAAAAAAC                     | <i>Col2a1a</i> enhancer+ <i>Hsp70l</i> reverse |
| MDS140      | tgcagtcgacGGTCGCCACCATGGTGAG                          | eGFP forward                                   |
| MDS141      | cattcgccctatagtgagcatatgATCAGCCATACCACATTTGTAGAGG     | eGFP reverse                                   |

1153 Primers used to amplify components of the *Col2a1a*:eGFP;*Bmp6* tooth enhancer:mCherry  
 1154 insulator containing bicistronic construct  
 1155

1156 ***Bmp6* intron 4 enhancer containing insulator construct**

1157 ***Marine Bmp6* enhancer/*Hsp70l*→eGFP+GAB+mCh←*Hsp70l*/Freshwater *Bmp6* enhancer**

1158 The first assembly was the same as the previous two constructs, except the primer pair  
 1159 MDS90/131 was used to specifically amplify the freshwater *Bmp6* enhancer. Linearization of the  
 1160 plasmid and Gibson Assembly was completed as before. The resulting plasmid was digested with  
 1161 *NdeI* and *Bsu36I* and the fragments for the second half, Marine *Bmp6* enhancer/*Hsp70l* and  
 1162 mCherry, were amplified with MDS164/139 and MDS140/141 respectively. The newly digested  
 1163 plasmid and amplicons were combined with Gibson Assembly master mix and incubated  
 1164 following the manufacturer's protocol.

| Primer name | Primer sequence                                       | description                                        |
|-------------|-------------------------------------------------------|----------------------------------------------------|
| MDS126      | cagataggcccctaaggactagtcatatgCTCACTATAGGGCGAATGGAGCTC | GAB forward                                        |
| MDS136      | atgtggtatgctgatGCCGCCAGTGTGATGGATATC                  | GAB reverse                                        |
| MDS137      | ccatcacactggcggcATCAGCCATACCACATTTGTAGAGG             | eGFP forward                                       |
| MDS89       | tgcagtcgacgggTGTGCGCCACCATGGTGAG                      | eGFP reverse                                       |
| MDS90       | catggtggcgaccACCGTCGACTGCAGGAAAAAAAAAAC               | Freshwater <i>Bmp6</i> + <i>Hsp70l</i> forward     |
| MDS131      | taaataaagattcattcaagatctggatccGAGAGCATCCGTCTTGTGGG    | Freshwater <i>Bmp6</i> + <i>Hsp70l</i> reverse     |
| MDS164      | ctgaaacacagccagataggcccctaagGAGAGCATCCGTCTTGTG        | Marine <i>Bmp6</i> enhancer+ <i>Hsp70l</i> forward |
| MDS139      | ggtggcgaccGTCGACTGCAGGAAAAAAAAAAC                     | Marine <i>Bmp6</i> enhancer+ <i>Hsp70l</i> reverse |
| MDS140      | tgcagtcgacGGTGTGCGCCACCATGGTGAG                       | mCh forward                                        |
| MDS141      | cattcgccctatagtgagcatatgATCAGCCATACCACATTTGTAGAGG     | mCh reverse                                        |

1165 Primers used to amplify components of the Freshwater *Bmp6* tooth enhancer:eGFP;marine *Bmp6*  
 1166 tooth enhancer:mCherry insulator containing bicistronic construct

1167

1168

### 1169 **Scoring effectiveness of insulators**

1170 To assess insulator effectiveness, all surviving injected fish were raised to 7 days post

1171 fertilization. At this time point the *Bmp6* intronic enhancer drives robust reporter expression in

1172 multiple domains including the distal edges of the median and pectoral fins, while the *Col2a1a*

1173 enhancer drives expression in the notochord (Cleves et al., 2018; Erickson et al., 2016). Four

1174 anatomical domains were scored for insulator effectiveness: the left and right pectoral fins, the

1175 median fin, and the notochord. Insulator efficiency was scored on a scale of 0 (apparent complete

1176 lack of insulation) to 2 (fully insulated enhancers) for each domain in which expression was

1177 observed. Insulation activity was only assessed for domains in which expression of at least a

1178 single fluorophore was present. Since effectiveness was scored in F<sub>0</sub> fish which are mosaic for

1179 the injected transgene, not all domains expressed a fluorophore.

1180

### 1181 **Supplemental Results**

#### 1182 **Insulator effectiveness in bicistronic constructs**

1183 Insulator scores were not significantly different across injection clutches for the *Col2a1a*

1184 *R2*:mCherry; *Bmp6* tooth enhancer:eGFP construct (Kruskal-Wallis left pectoral fin  $P = 0.075$ ,

1185 right pectoral fin  $P = 0.52$ , median fin fold  $P = 0.116$ , Wilcoxon rank sum notochord  $P = 0.25$ ),  
1186 nor the *Col2a1a* R2:eGFP; *Bmp6* tooth enhancer:mCherry construct (Wilcoxon rank sum left  
1187 pectoral fin  $P = 0.144$ , right pectoral fin  $P = 0.134$ , median fin fold  $P = 0.211$ ), suggesting that  
1188 the inter-clutch variation did not have a significant impact on insulation scores. The left pectoral  
1189 fin ( $P = 0.036$ ) and the median fin fold ( $P = 0.016$ ) were found to be significantly different  
1190 between the two constructs while the right pectoral fin ( $P = 0.68$ ) and notochord ( $P = 0.29$ ) were  
1191 not significantly different.

1192

### 1193 **Marine enhancer activity in the epithelium differs across tooth stage and fish size**

1194 In post-tooth number divergence fish activity of the freshwater enhancer was observed in the  
1195 epithelium in both ventral and dorsal tooth plates in all pre-eruption teeth  
1196 (marine:mCherry;freshwater:eGFP ventral: 59/59, dorsal: 44/44, and  
1197 marine:eGFP;freshwater:mCherry ventral: 39/39, dorsal: 48/48), while the marine allele was  
1198 observed in a subset of pre-eruption teeth (marine:mCherry;freshwater:eGFP ventral: 50/59  
1199 [84.7%], dorsal: 33/44 [75.0%], and marine:eGFP;freshwater:mCherry ventral: 35/39 [89.7%],  
1200 dorsal: 34/48 [70.8%]). A higher percentage of early stage pre-eruption germs had marine  
1201 activity in the epithelium compared to middle stage pre-eruption germs  
1202 (marine:mCherry;freshwater:eGFP ventral: 20/23 [87.0%], dorsal: 24/29 [82.8%], and  
1203 marine:eGFP;freshwater:mCherry ventral: 21/23 [91.3%], dorsal: 18/24 [75%]) than middle  
1204 stage germs (marine:mCherry;freshwater:eGFP ventral: 30/36 [83.3%], dorsal: 9/15 [60.0%],  
1205 and marine:eGFP;freshwater:mCherry ventral: 14/16 [87.5%], dorsal: 16/24 [66.7%]). In  
1206 contrast to post-divergence, or  $> 20$  mm total length, the marine enhancer in pre-divergence fish

1207 was active in every pre-eruption tooth germ (marine:mCherry;freshwater:eGFP ventral: 31/31,  
1208 dorsal: 36/36, and marine:eGFP;freshwater:mCherry ventral: 29/29, dorsal: 29/29).

1209

### 1210 **Mesenchymal bias differs across tooth stage, plate, and fish size**

1211 Mesenchymal bias, in which one enhancer was observed to drive a broader domain within the  
1212 mesenchyme, was scored for post divergence fish. In early and middle stage teeth, we observed a  
1213 consistent marine enhancer bias in the ventral (marine:mCherry;freshwater:eGFP early: 23/23,  
1214 middle: 36/36, marine:eGFP;freshwater:mCherry early: 21/23 [91.3%], middle: 16/16) and  
1215 dorsal tooth plates (early: 28/29, 96.6%, middle:15/15, marine:eGFP;freshwater:mCherry early:  
1216 24/24, middle: 24/24)). A larger proportion of functional, erupted teeth were observed to have a  
1217 marine bias in the mesenchyme in the ventral tooth plate (marine:mCherry;freshwater:eGFP  
1218 87/108 [80.6%], marine:eGFP;freshwater:mCherry 86/97 [88.7%]) compared to the dorsal tooth  
1219 plate (marine:mCherry;freshwater:eGFP 59/105 [56.2%], marine:eGFP;freshwater:mCherry  
1220 74/101 [73.3%] (Figure 5B-C). There was a reduction in the proportion of erupted teeth with a  
1221 marine bias when comparing post to pre divergence fish for all integrations and tooth plates (pre-  
1222 divergence marine:mCherry;freshwater:eGFP ventral: 54/80 [67.5%] and  
1223 marine:eGFP;freshwater:mCherry ventral: 63/98 [64.3%], dorsal pre: 51/103 [49.5%]) (Figure  
1224 5B) except for the dorsal tooth plates in the freshwater:eGFP;marine:mCherry genotype (pre:  
1225 55/91 [60.4%], post: 59/105[56.2%]).
